# Supplementary material
Source: PubMed Central journal article supplement (PMC5282834)

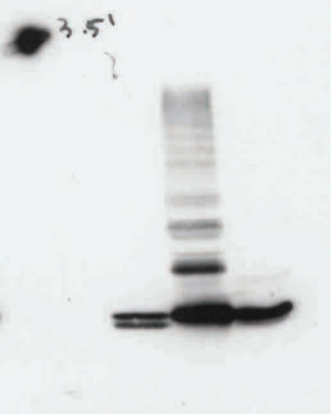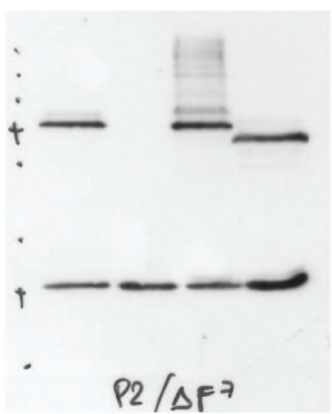

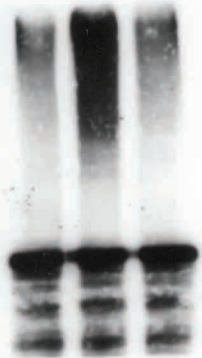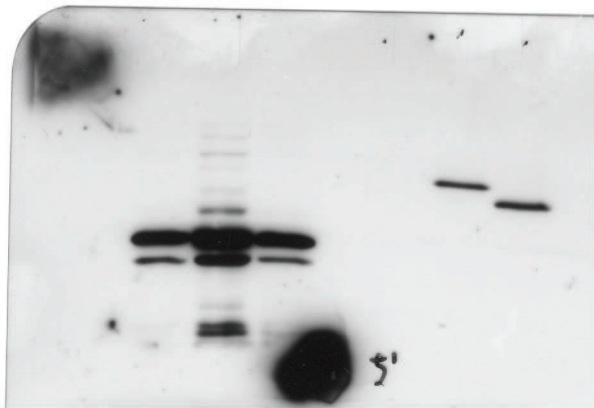

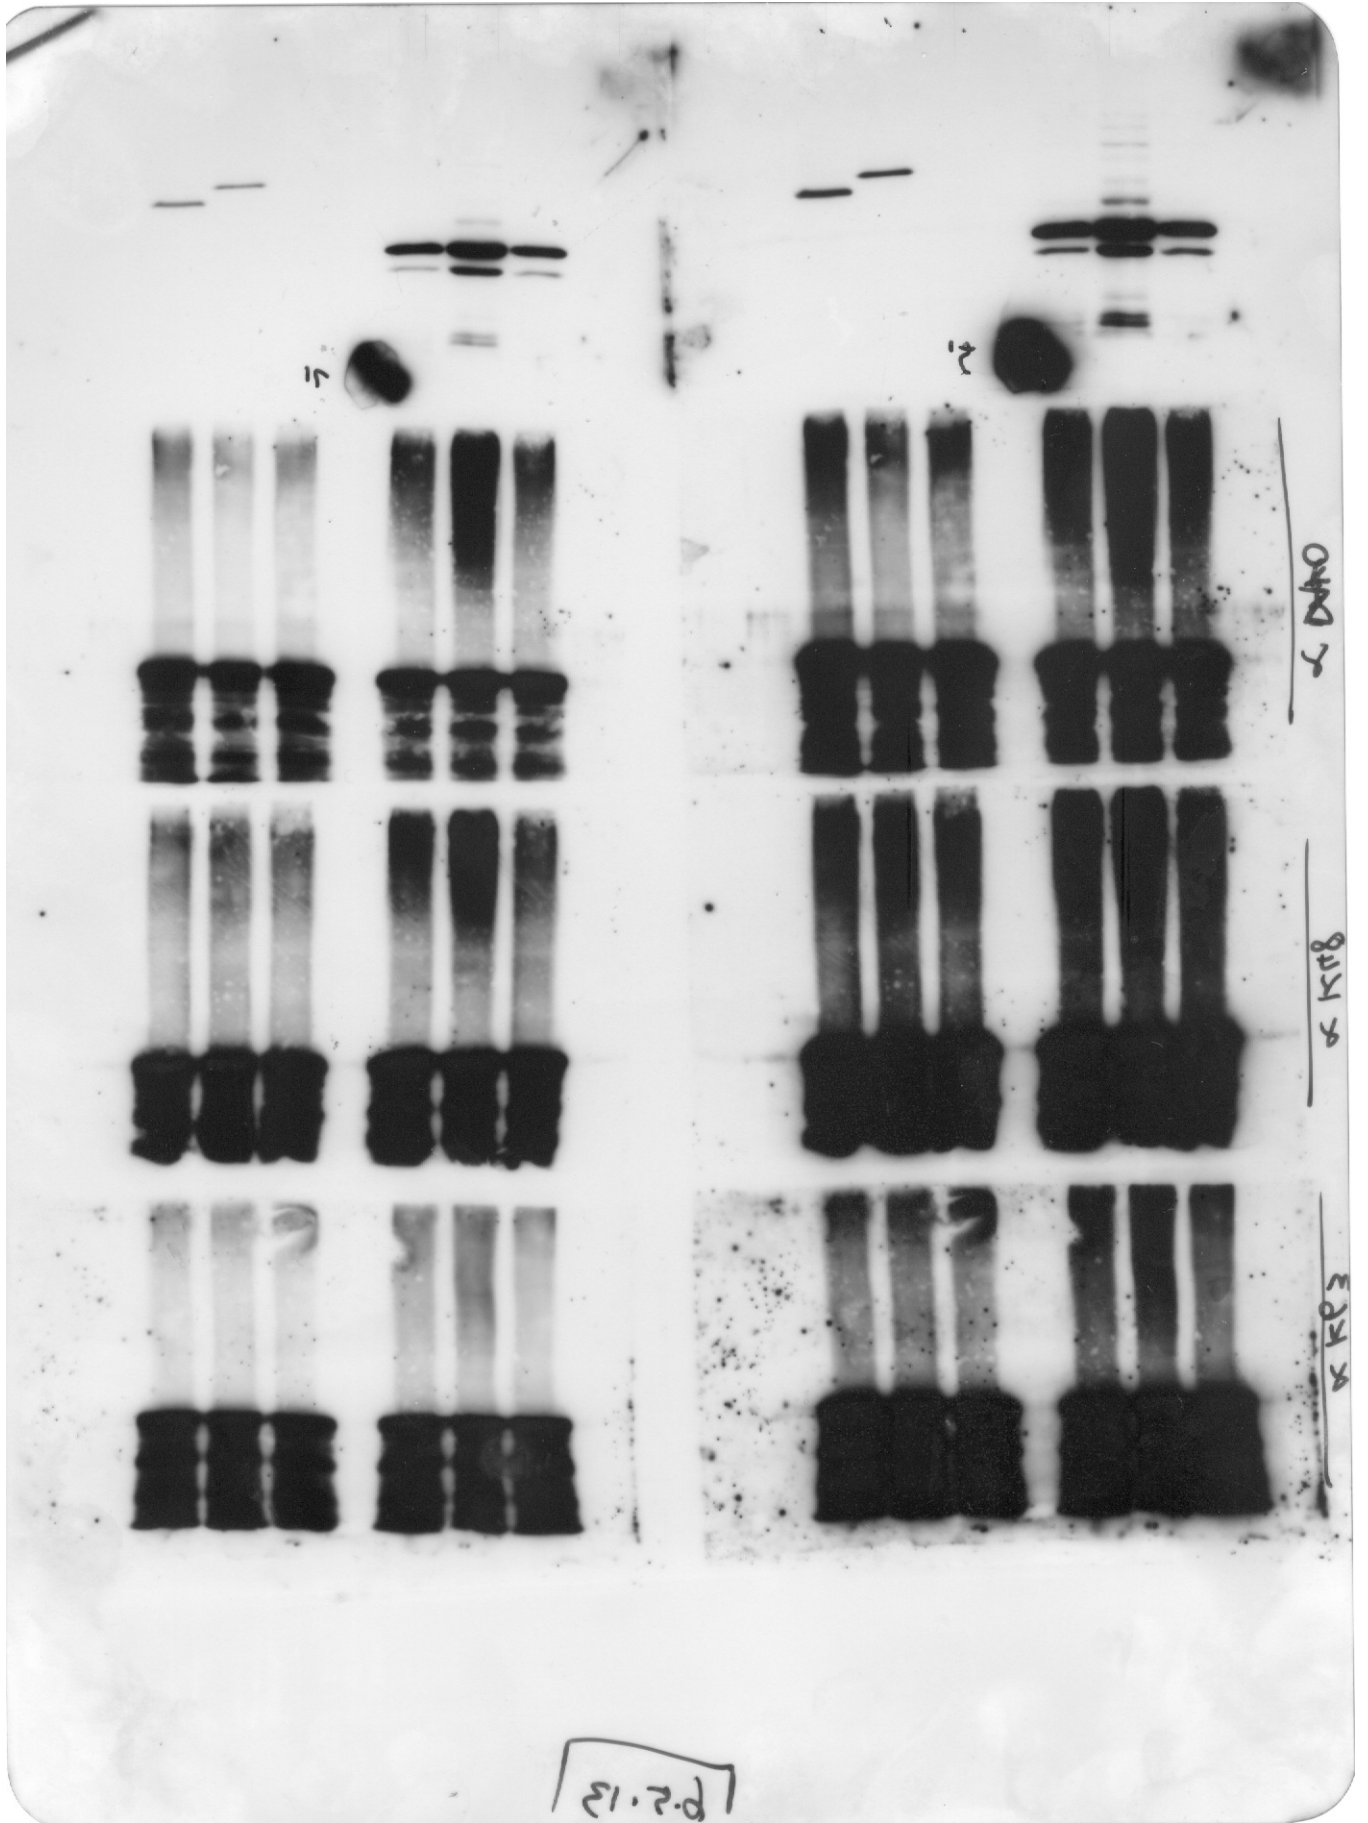

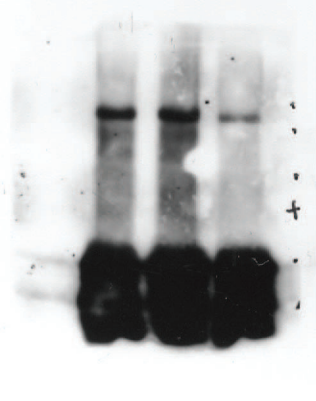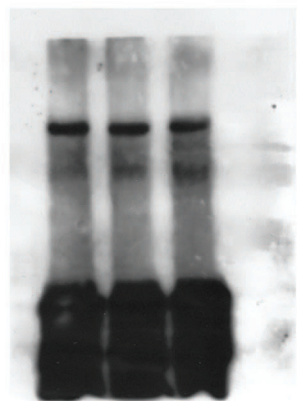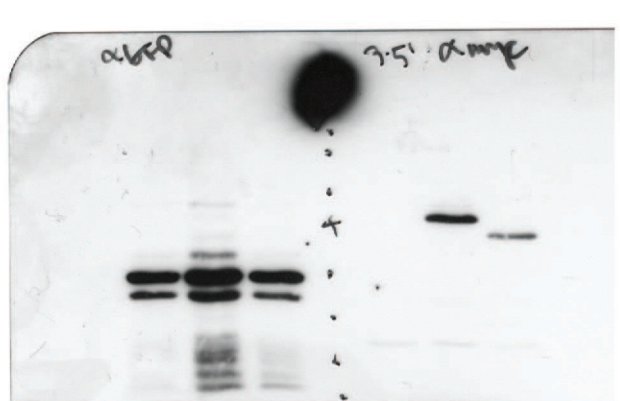

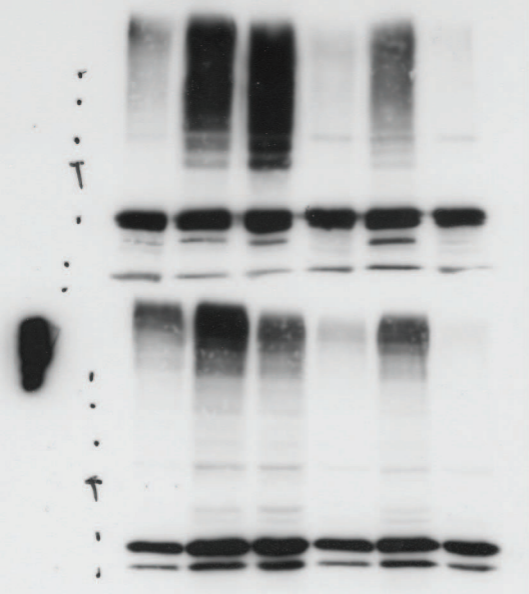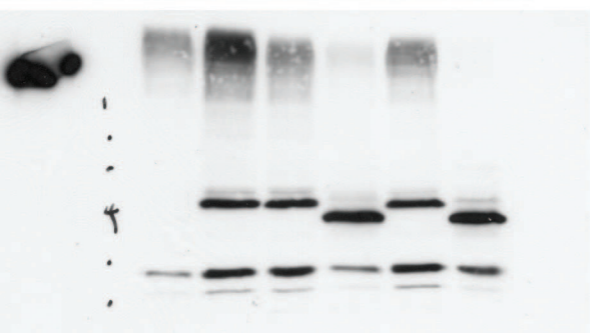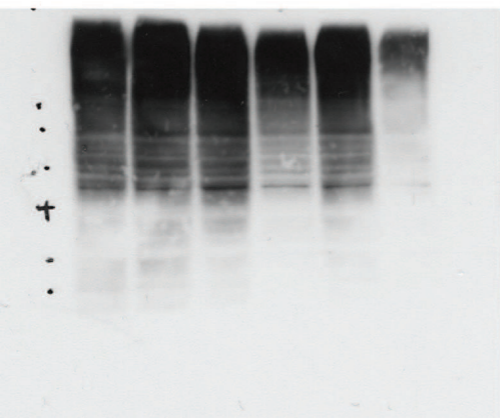

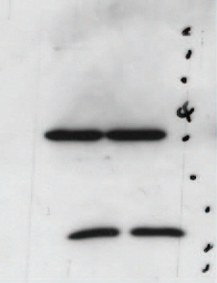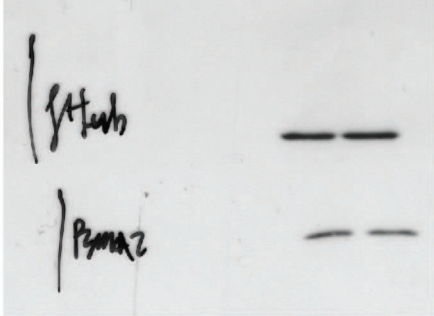

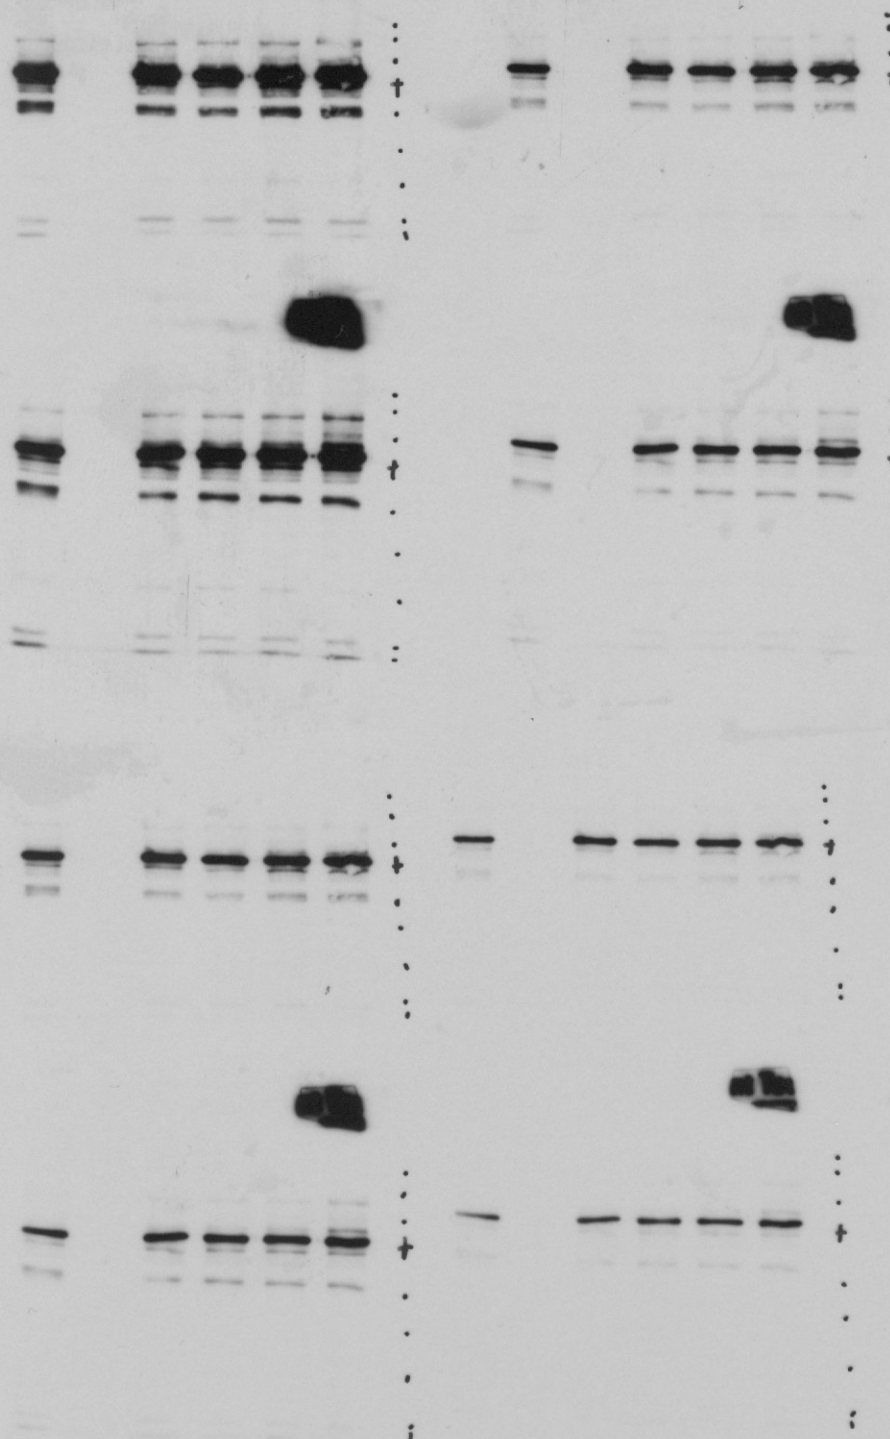

small (copy)

big (copy)

IB: B507

at Tot

5.6.16

2/52

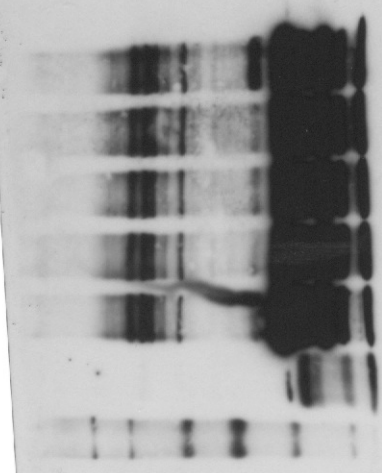

IB: GFP

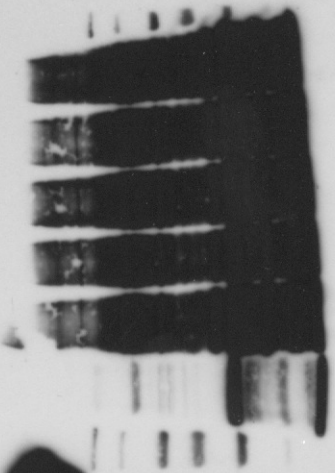

IB: Puro 2  
(15870)

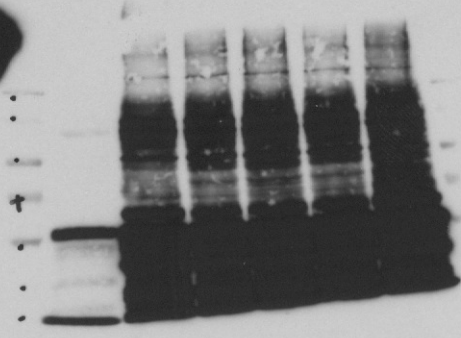

IB: P2 (15870)

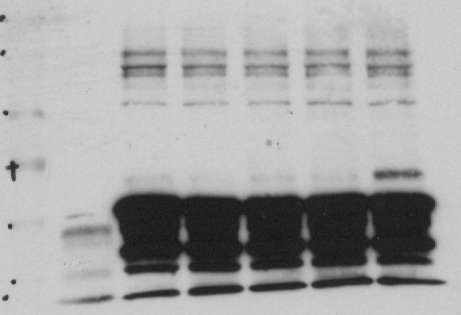

IB: GFP



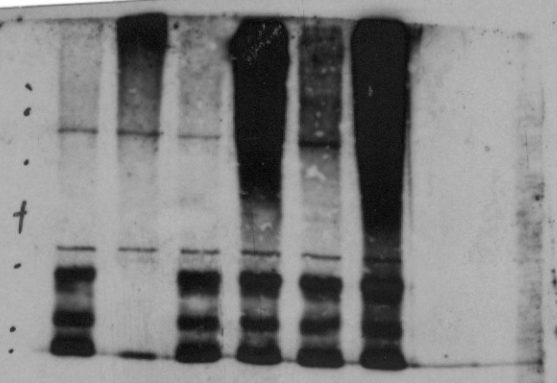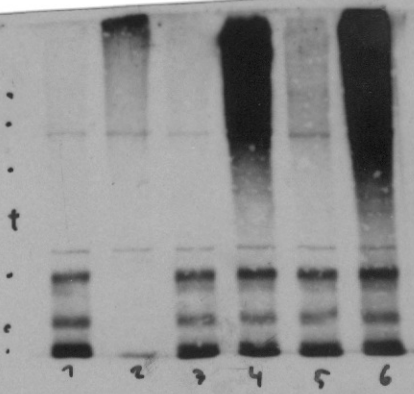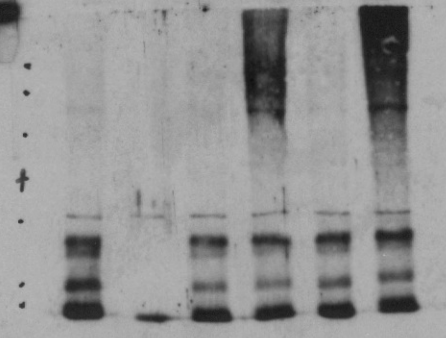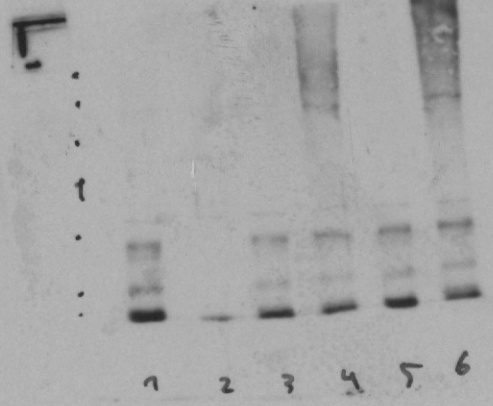

1 - F2-SCF, no substrate  
 2 - no F2-SCF, F1-CPD-~~substrate~~  
 3 - -E2  
 4 - UbcH2  
 5 - UbcH3  
 6 - UbcH2

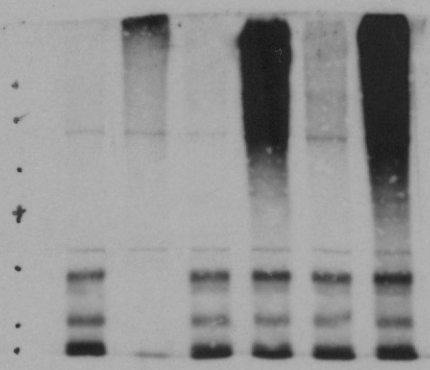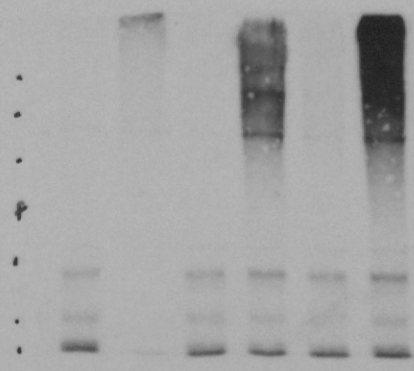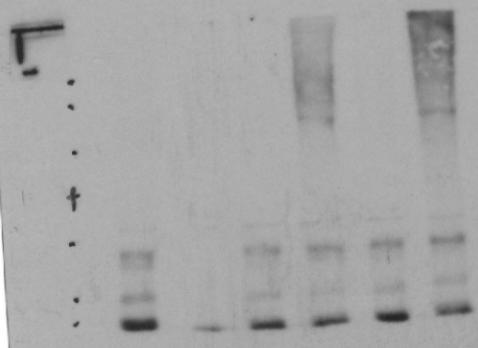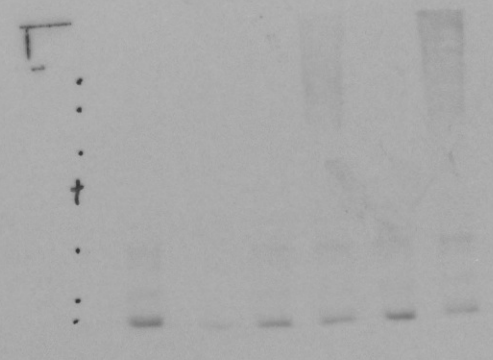

Supplement: EMBJ-35-2008-s005.pdf [file EMBJ-35-2008-s005.pdf]
