# Supplementary material
Source: PubMed Central journal article supplement (PMC5282834)
Supplement: EMBJ-35-2008-s002.pdf [file EMBJ-35-2008-s002.pdf]

## Expanded View Figures

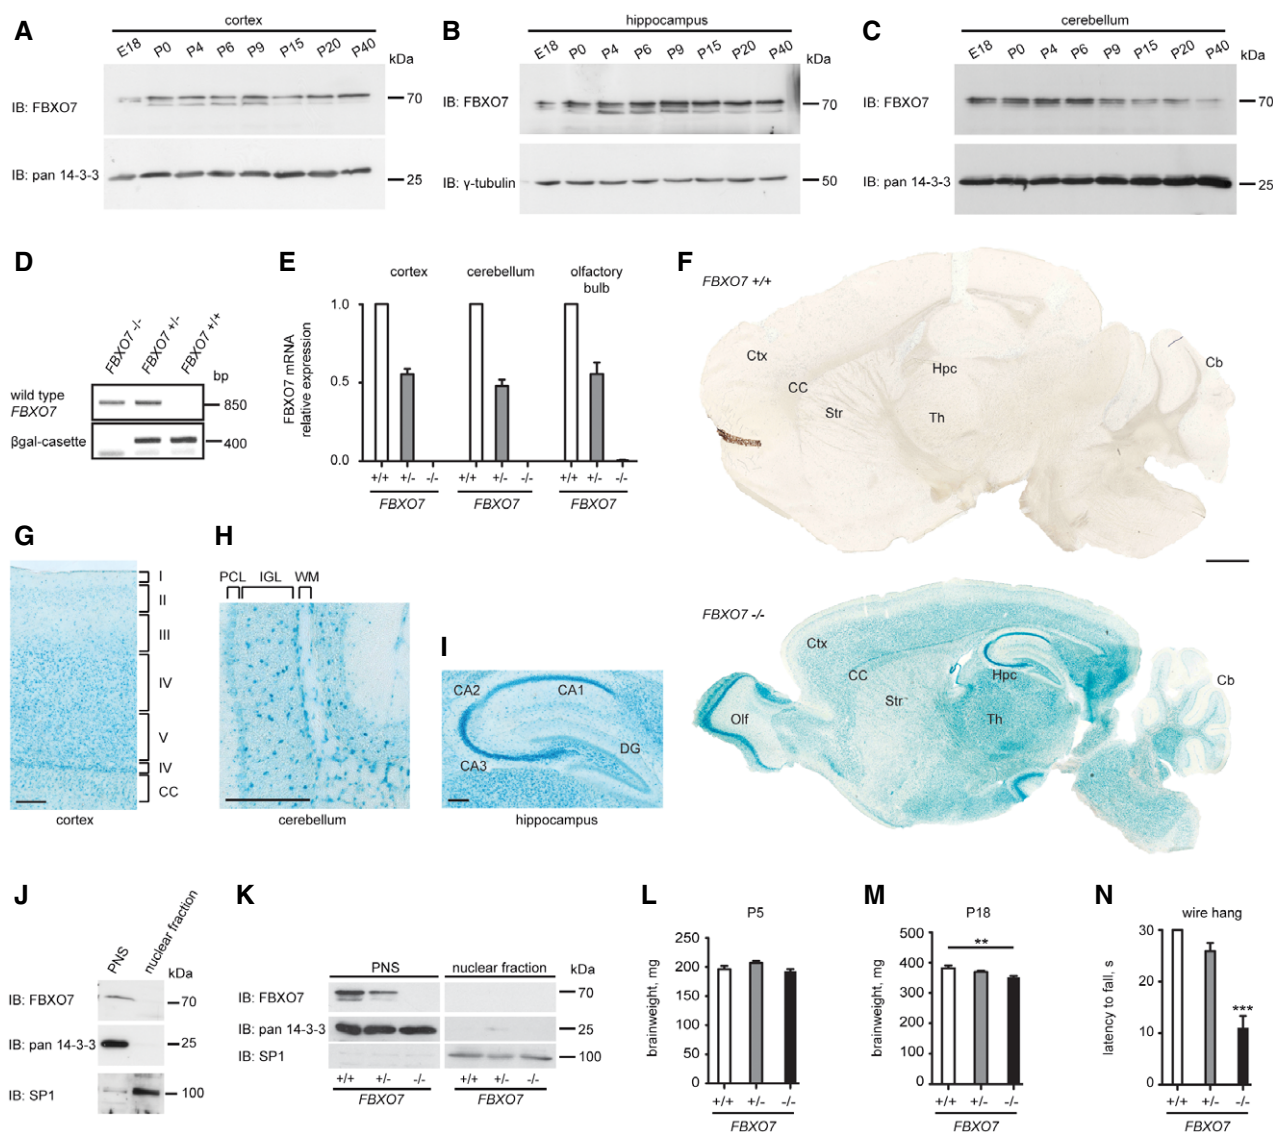**Figure EV1. Characterization of *FBXO7*<sup>-/-</sup> mice.**

- A–C Lysates of cortices (A), hippocampi (B), and cerebella (C) of the indicated age isolated from rat were immunoblotted with FBXO7, pan 14-3-3, or γ-tubulin antibodies. The latter two served as loading controls.
- D Genotyping of *FBXO7*<sup>+/+</sup>, *FBXO7*<sup>+/-</sup>, and *FBXO7*<sup>-/-</sup> mice. Detection of wild-type and mutant *FBXO7* alleles.
- E Quantitative PCR of *FBXO7*<sup>+/+</sup>, *FBXO7*<sup>+/-</sup> and *FBXO7*<sup>-/-</sup> brain tissue. *n* = 4, 2, and 4, respectively (mean ± s.e.m.).
- F LacZ staining of P18 *FBXO7*<sup>+/+</sup> and *FBXO7*<sup>-/-</sup> sagittal brain sections. Ctx = cortex, Hpc = hippocampus, Cb = cerebellum, Olf = olfactory bulb, CC = corpus callosum, Str = striatum, Th = thalamus. Scale bar = 1 mm.
- G–I Higher magnification of LacZ-stained P18 *FBXO7*<sup>-/-</sup> sagittal brain: cortex (G), cerebellum (H), and hippocampus (I). CC = corpus callosum, PCL = Purkinje cell layer, IGL = internal granule cell layer, WM = white matter, DG = dentate gyrus, CA1, 2, 3 = cornu ammonis 1, 2, 3. Scale bars = 200 μm.
- J, K Cultured rat cerebellar granule neurons (J) or mouse cortical tissue (K) was subjected to subcellular fractionation analyses. Nuclear fraction and postnuclear supernatant (PNS) were immunoblotted with FBXO7, SP1, and pan 14-3-3 antibodies. The latter two served as quality control for the nuclear fraction and PNS, respectively.
- L, M Brain weight of P5 and P18 *FBXO7*<sup>+/+</sup>, *FBXO7*<sup>+/-</sup>, or *FBXO7*<sup>-/-</sup> mice. *n* = 8, 20, and 7 (L) and *n* = 6, 11, and 8 (M), respectively (ANOVA, \*\**P* < 0.01, mean ± s.e.m.).
- N P18 littermates were tested on the hanging wire. *n* = 20, 23, and 16, respectively (ANOVA, \*\*\**P* < 0.001, mean ± s.e.m.).

Source data are available online for this figure.

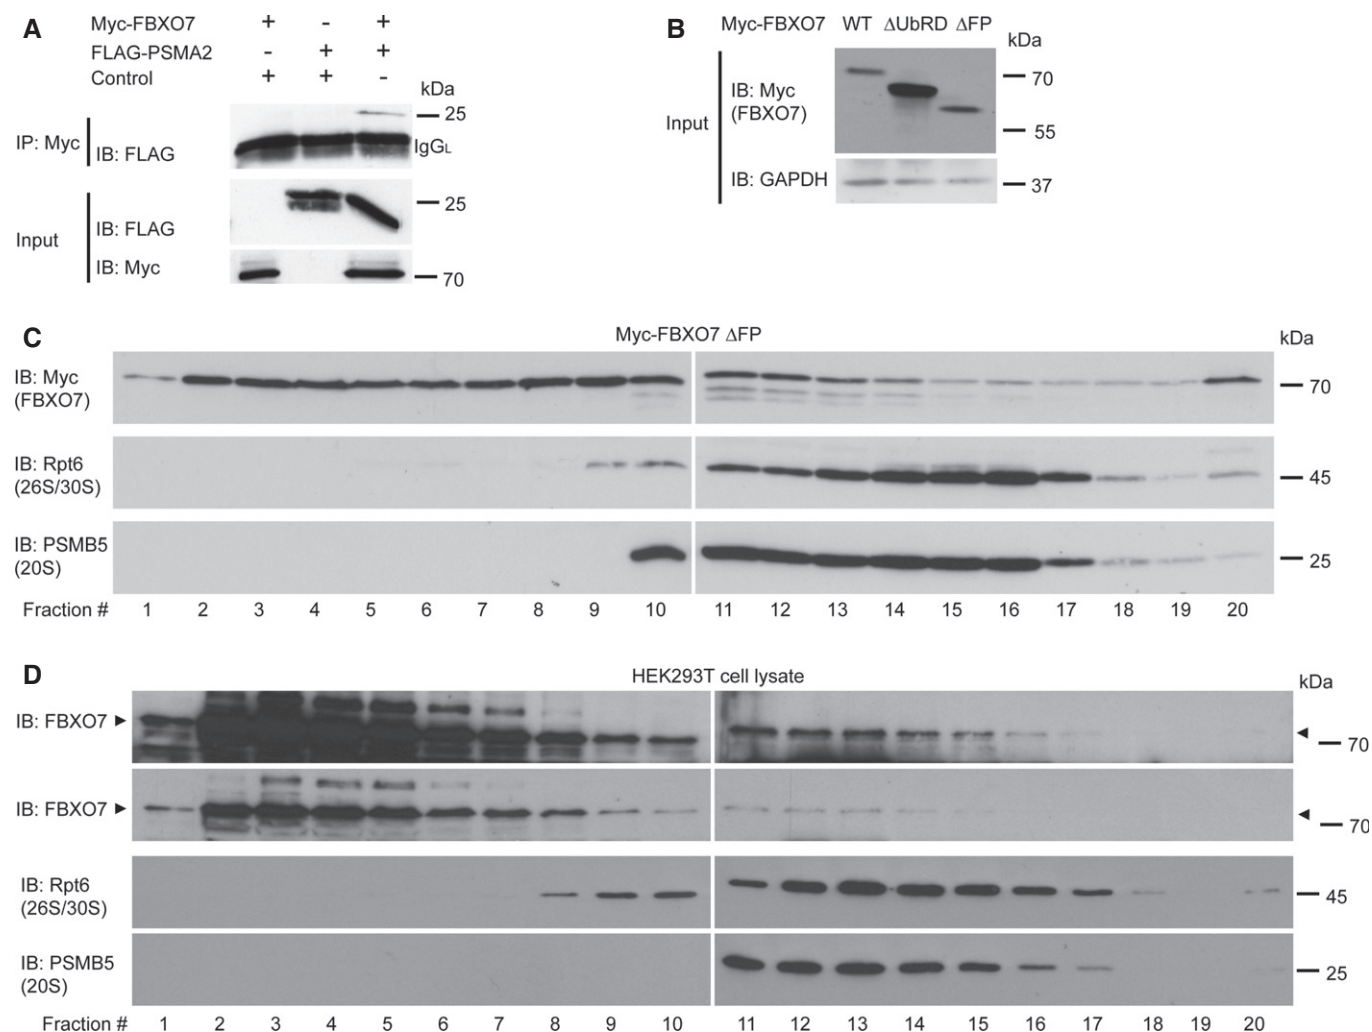

**Figure EV2. FBXO7 interacts with the proteasomal subunit PSMA2 and binds to the proteasome.**

- A Lysates of HEK293T cells, transfected with the indicated plasmids, were subjected to IP with myc antibody for FBXO7, followed by IB with FLAG antibody for PSMA2.
- B Input from HEK293T cells, transfected with full-length myc-FBXO7, ΔUbrD, or ΔFP (panel C and Fig 3E), was immunoblotted with myc (FBXO7) or GAPDH antibody. The latter served as a loading control.
- C HEK293T cells were transfected with myc-FBXO7 ΔFP and subjected to fractionation using a 10–40% linear glycerol gradient. Fractions were immunoblotted for myc (FBXO7), Rpt6 (26S/30S proteasome), and PSMB5 (20S proteasome).
- D HEK293T cells were subjected to fractionation using a 10–40% linear glycerol gradient. Fractions were immunoblotted for FBXO7, Rpt6 (26S/30S proteasome), and PSMB5 (20S proteasome).

Source data are available online for this figure.

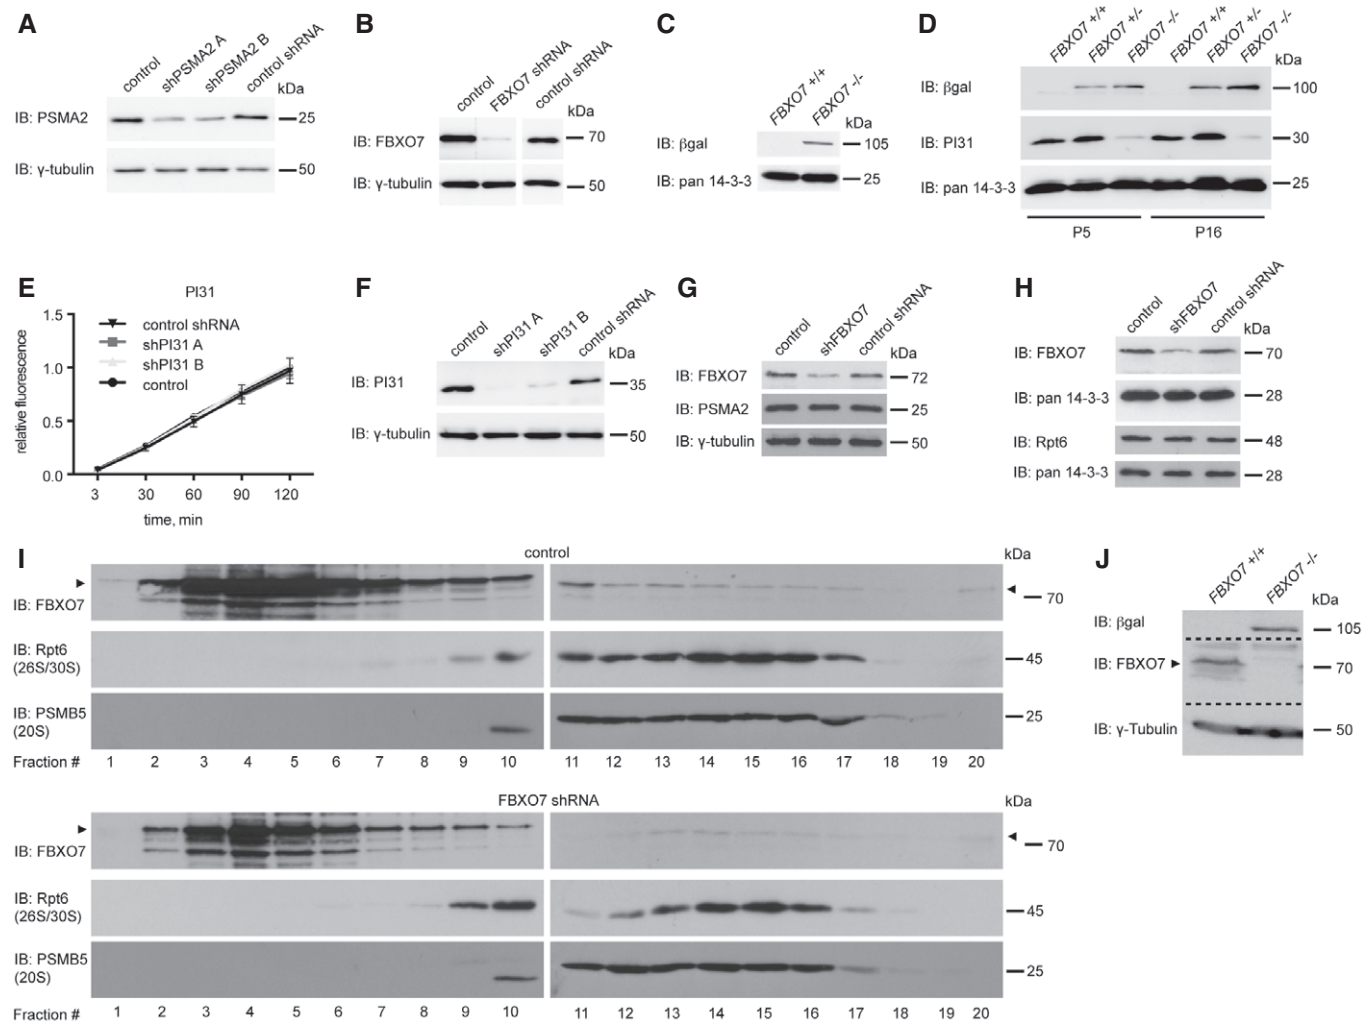

**Figure EV3. FBXO7 ubiquitinates PSMA2 and regulates proteasome assembly.**

- A Control of knockdown for Fig 5A. Lysates of HEK293T cells transfected with empty control vector or PSMA2 shRNA plasmids were immunoblotted with PSMA2 or  $\gamma$ -tubulin antibody. The latter served as a loading control.
- B Control of knockdown for Fig 5B. Lysates of HEK293T cells transfected with empty control vector, FBXO7 shRNA, or non-functional FBXO7 shRNA plasmids, were immunoblotted with FBXO7 or  $\gamma$ -tubulin antibody. The latter served as a loading control.
- C Control of knockout for Fig 5C. Brain lysates from *FBXO7*<sup>+/+</sup> or *FBXO7*<sup>-/-</sup> mice were immunoblotted with  $\beta$ gal or pan 14-3-3 antibody. The latter served as a loading control.
- D Whole brain lysates from *FBXO7*<sup>+/+</sup>, *FBXO7*<sup>+/-</sup>, and *FBXO7*<sup>-/-</sup> mice at age P5 and P16 were subjected to immunoblotting with  $\beta$ gal and PI31 antibodies. Pan 14-3-3 was used as a loading control.
- E Lysates from HEK293T cells, transfected with empty control vector, functional PI31 shRNA, or non-functional PI31 shRNA, were analyzed for chymotrypsin-like proteasome activity assay (LLVY-AMC). Three independent experiments were carried out (ANOVA, mean  $\pm$  s.e.m.).
- F Input from (E) was immunoblotted with PI31 or  $\gamma$ -tubulin antibody. The latter served as a loading control.
- G Control of knockdown and loading for Fig 5E. Lysates of HEK293T cells transfected with empty control vector or FBXO7 shRNA plasmids were immunoblotted with FBXO7, PSMA2, or  $\gamma$ -tubulin antibody. The latter served as a loading control.
- H Control of knockdown and loading for Fig 5F. Lysates of HEK293T cells transfected with empty control vector or FBXO7 shRNA plasmids were immunoblotted with FBXO7, Rpt6, or pan14-3-3 antibody. The latter served as a loading control.
- I HEK293T cells transfected with empty control vector or the FBXO7 RNAi plasmid were subjected to fractionation using a 10–40% linear glycerol gradient. Fractions were subjected to immunoblotting with FBXO7, Rpt6 (26S/30S proteasome), or PSMB5 (20S proteasome) antibody.
- J Control of knockout and loading for Fig 5H. Brain lysates from *FBXO7*<sup>+/+</sup> or *FBXO7*<sup>-/-</sup> mice were immunoblotted with  $\beta$ gal, FBXO7, or  $\gamma$ -tubulin antibody. The latter served as loading control.

Source data are available online for this figure.

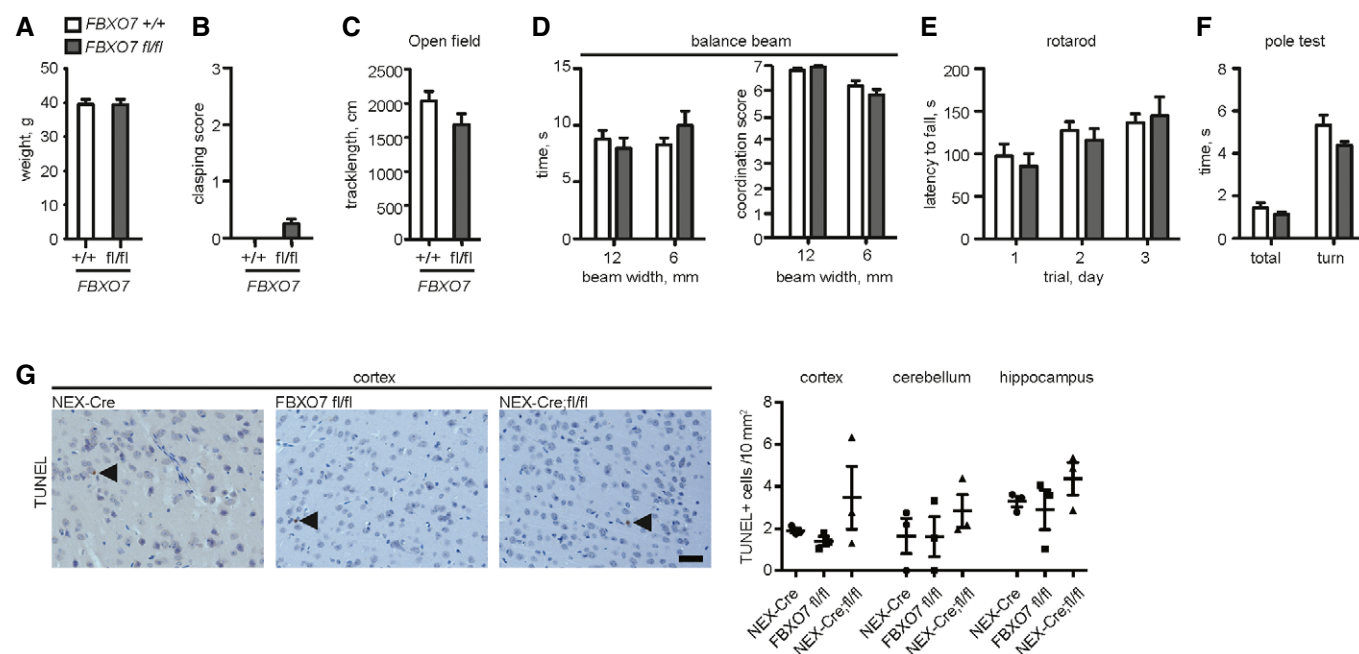

**Figure EV4. Deletion of *FBXO7* in the forebrain triggers early-onset motor impairment.**

- A Average body weight of 12-month-old *FBXO7*<sup>+/+</sup> or *FBXO7*<sup>fl/fl</sup> mice. *n* = 13 and 10, respectively (t-test, mean ± s.e.m.).
- B Hind limb clasp of 12-month-old *FBXO7*<sup>+/+</sup> or *FBXO7*<sup>fl/fl</sup> mice. *n* = 13 and 10, respectively (Mann–Whitney *U*-test, mean ± s.e.m.).
- C–F Open field test (C), balance beam test (time to cross and coordination score were measured, D), rotarod (E), and pole test (F) of 12-month-old *FBXO7*<sup>+/+</sup> or *FBXO7*<sup>fl/fl</sup> mice. *n* = 13 and 10, respectively (unpaired *t*-test or Mann–Whitney *U*-test (coordination score), mean ± s.e.m.).
- G Sagittal paraffin sections from NEX-Cre, *FBXO7*<sup>fl/fl</sup>, or NEX-Cre;*fl/fl* mice cortices were subjected to TUNEL staining. Three mice per genotype were included in the analysis (ANOVA, mean ± s.e.m.). Scale bar = 40 μm.

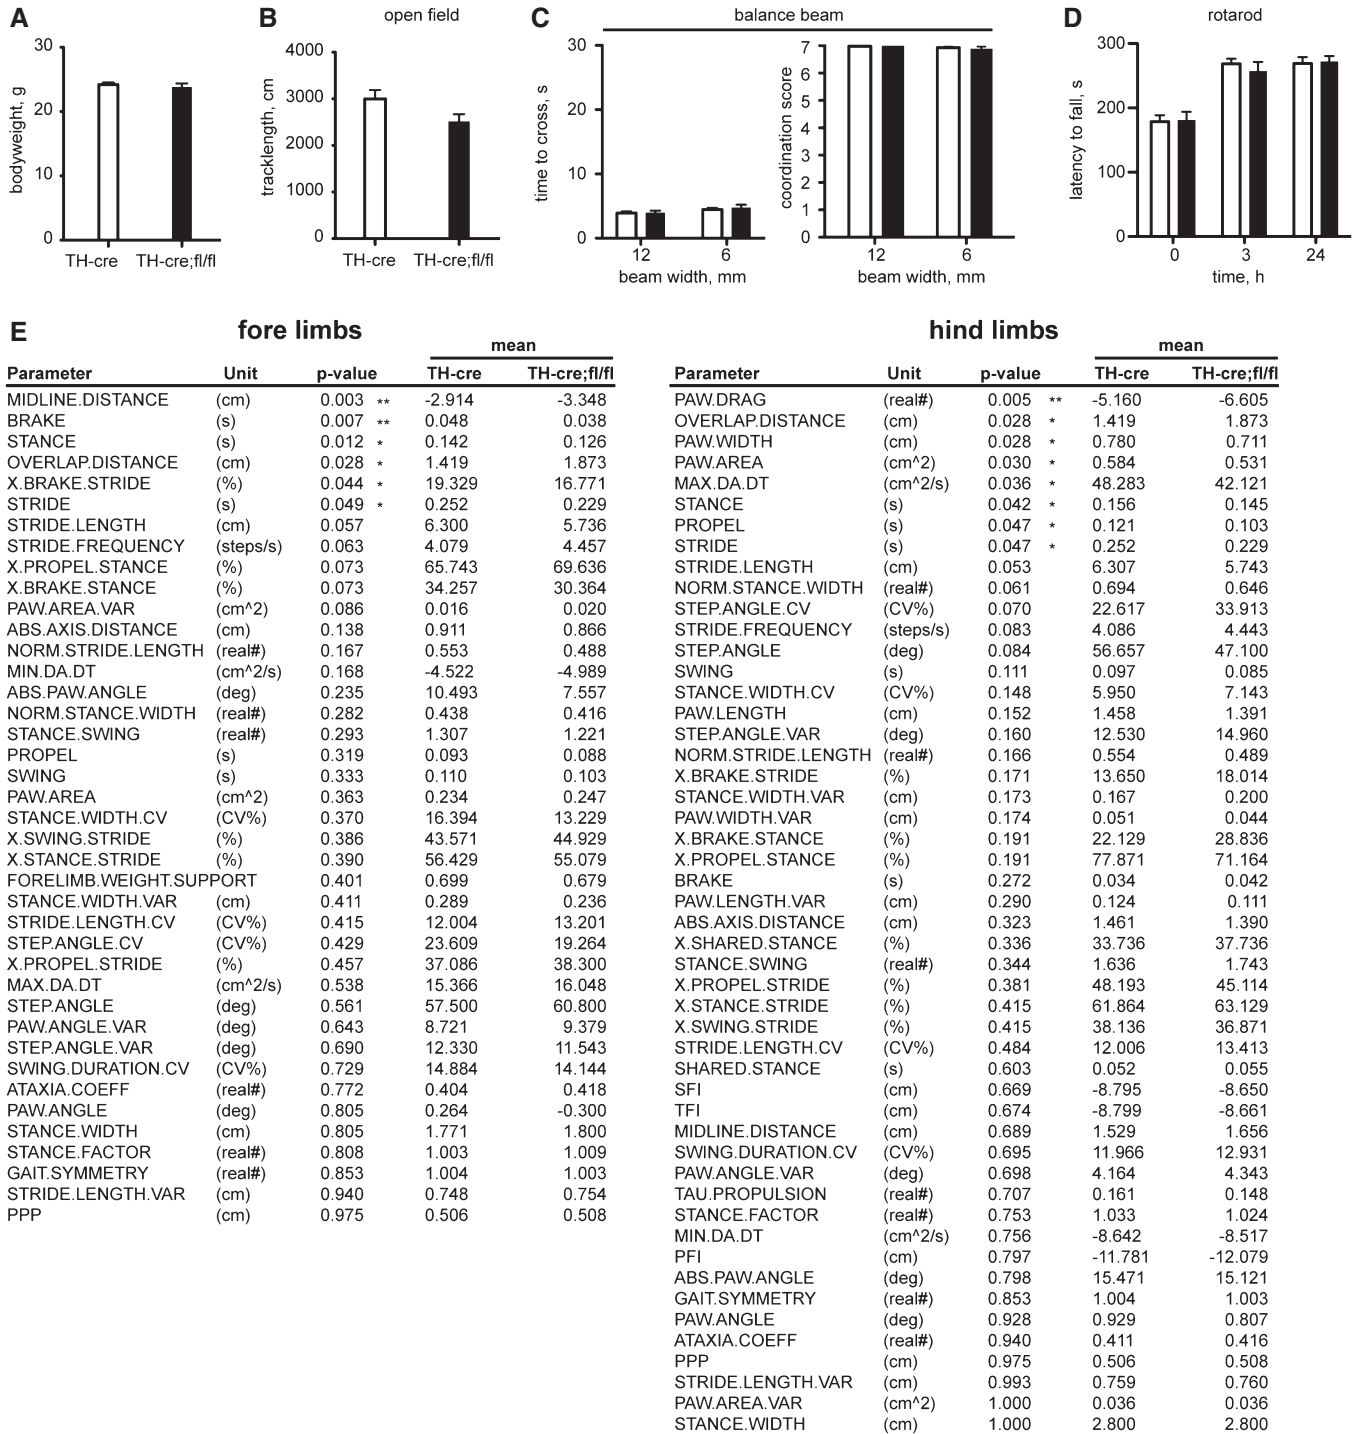

**Figure EV5. Loss of FBXO7 in TH<sup>+</sup> cells results in late-onset motor deficits.**

- A Average body weight of 2-month-old TH-Cre and TH-Cre;fl/fl mice.  $n = 15$  and  $9$ , respectively (unpaired  $t$ -test, mean  $\pm$  s.e.m.).
- B–D Open field test (B), balance beam test (time to cross and coordination score were measured, C), and rotarod (D) of 2-month-old TH-Cre and TH-Cre;fl/fl mice.  $n = 15$  and  $9$ , respectively (unpaired  $t$ -test or Mann–Whitney  $U$ -test (coordination score), mean  $\pm$  s.e.m.).
- E Parameters tested in DigiGait analysis (unpaired  $t$ -test, \* $P < 0.05$ , \*\* $P < 0.01$ , mean  $\pm$  s.e.m.).
