# Supplementary material
Source: PubMed Central journal article supplement (PMC5282834)
Supplement: EMBJ-35-2008-s006.pdf [file EMBJ-35-2008-s006.pdf]

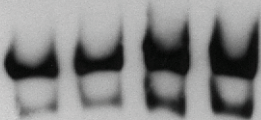

5'

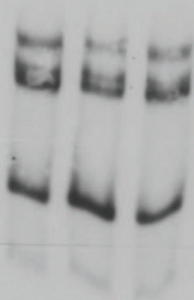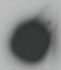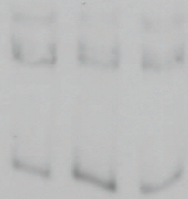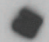

α<sub>2</sub> Rpt's

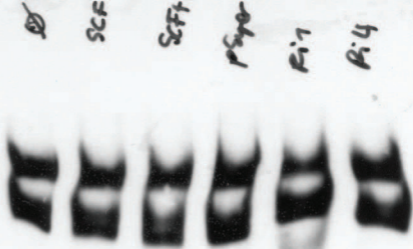

Handwritten text, possibly a list or notes, located in the top section of the page.

Small handwritten mark or signature.

Handwritten text, possibly a list or notes, located in the middle section of the page.

Small handwritten mark or signature.

Handwritten text, possibly a list or notes, located in the bottom section of the page.

Small handwritten mark or signature.
