# Supplementary material
Source: PubMed Central journal article supplement (PMC5282834)

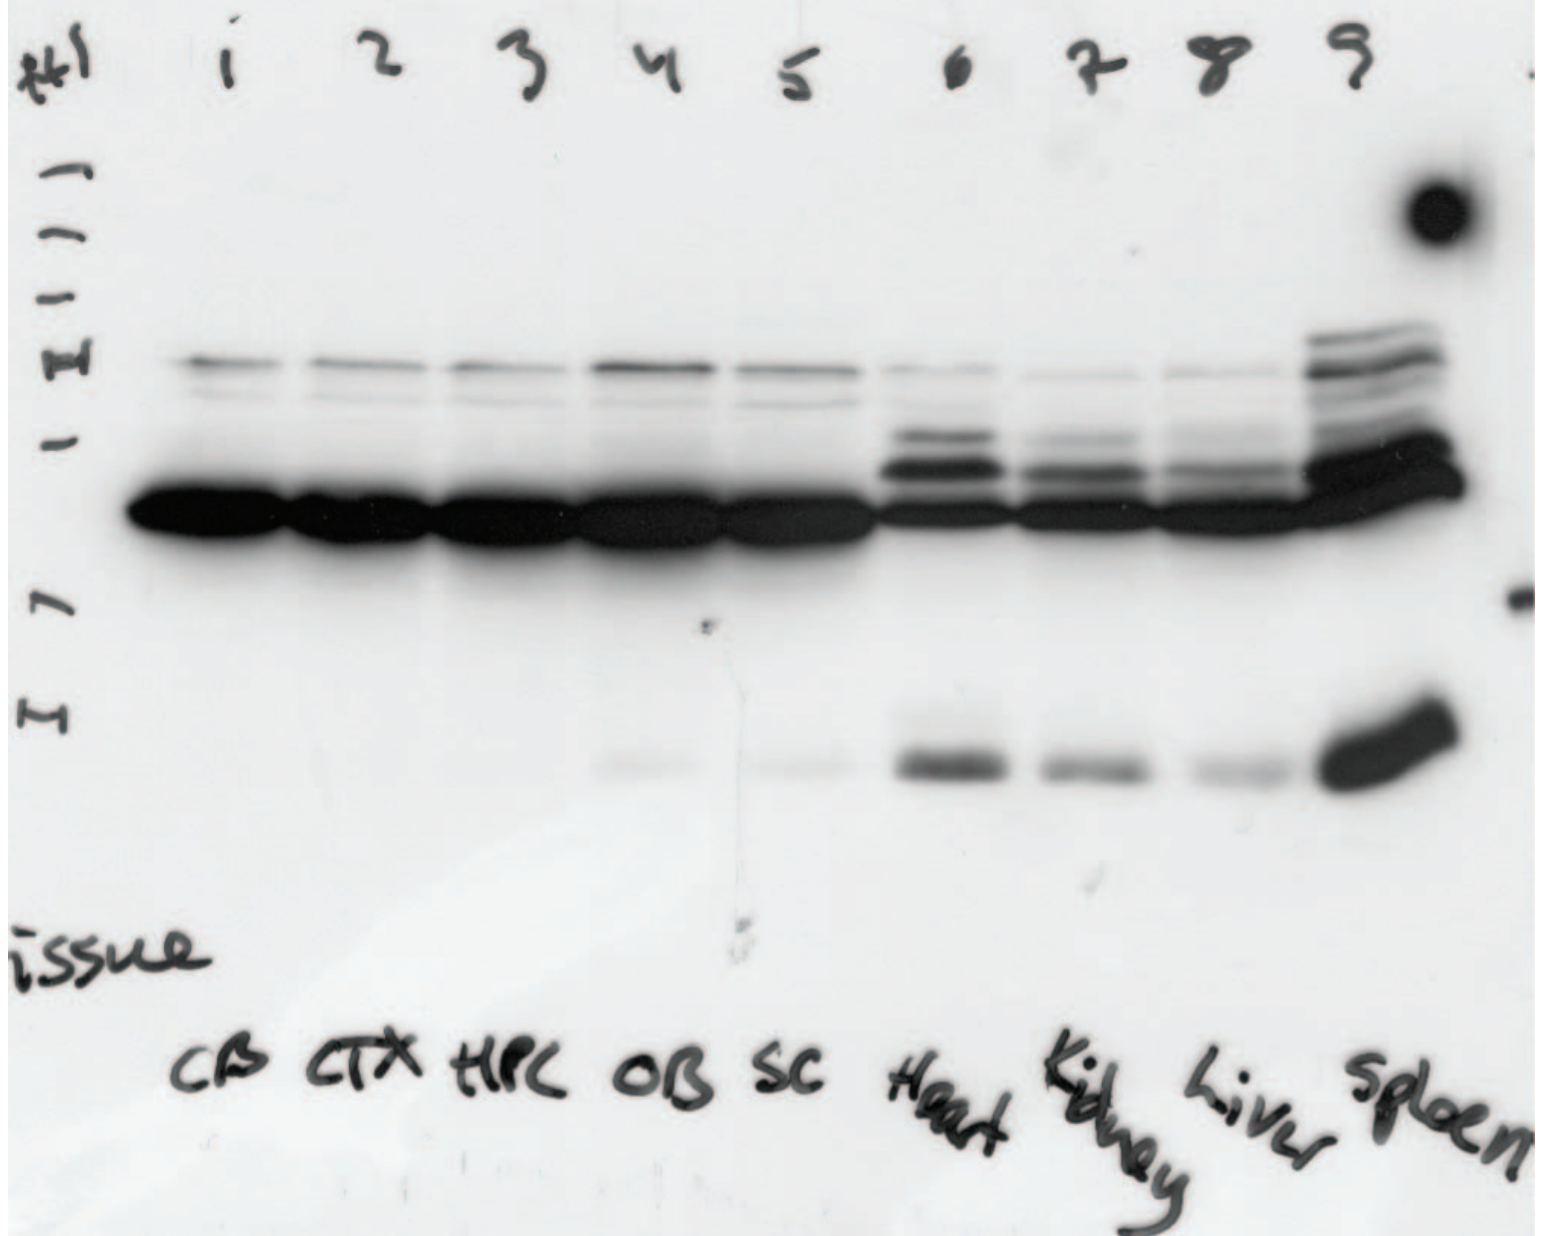

ISSUE

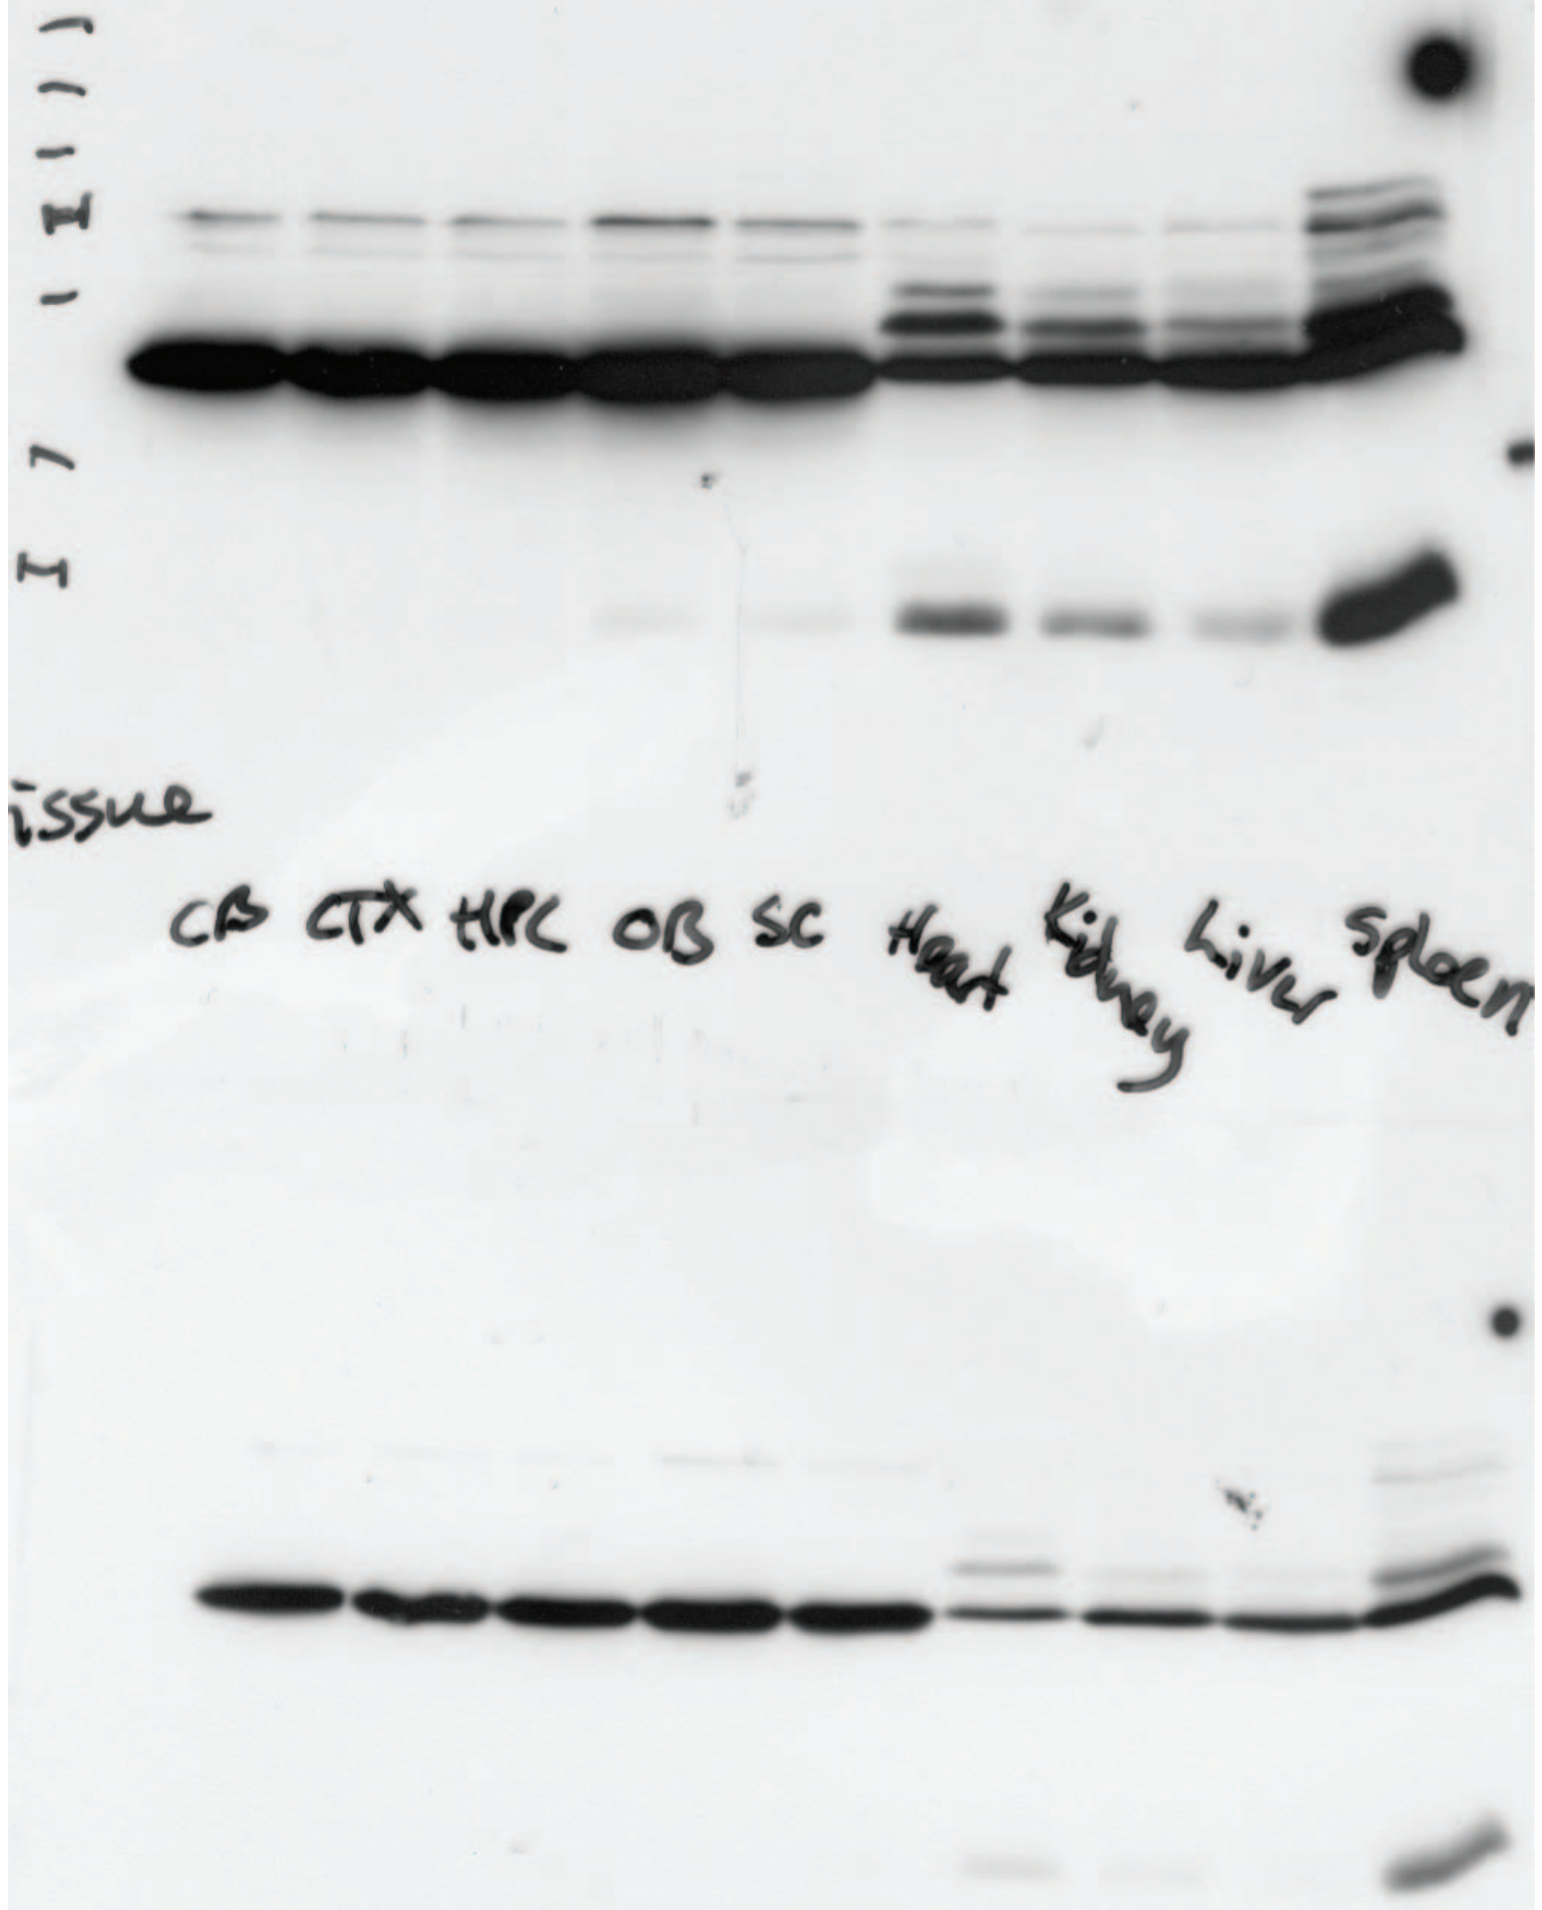

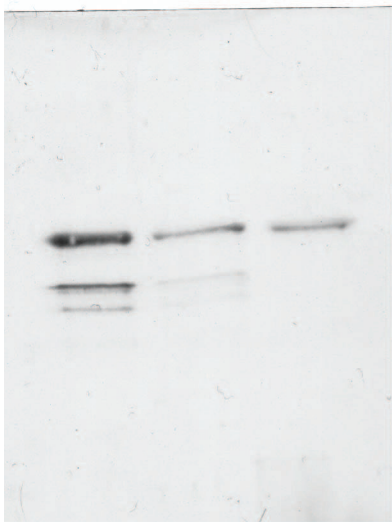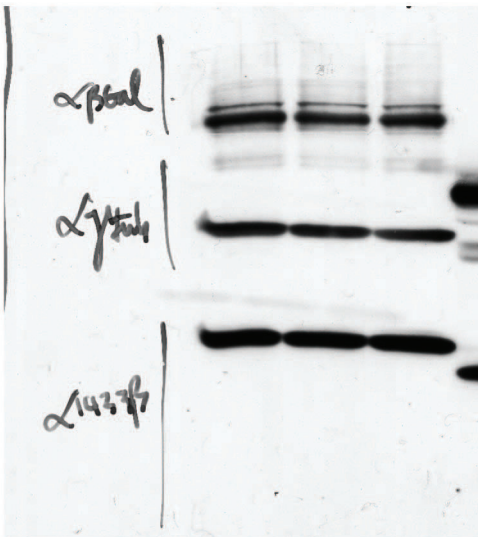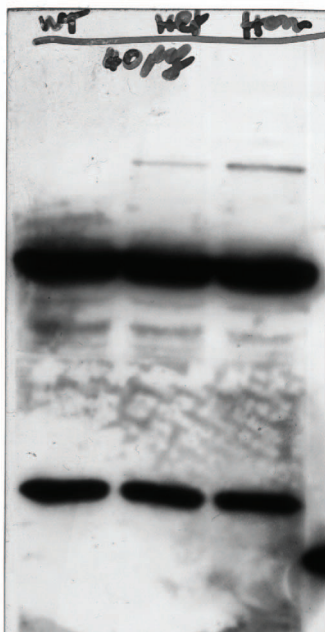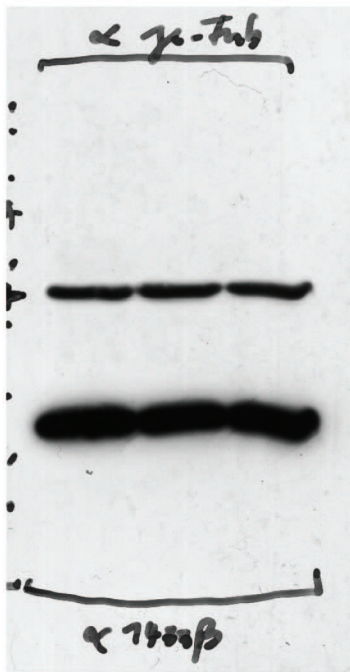

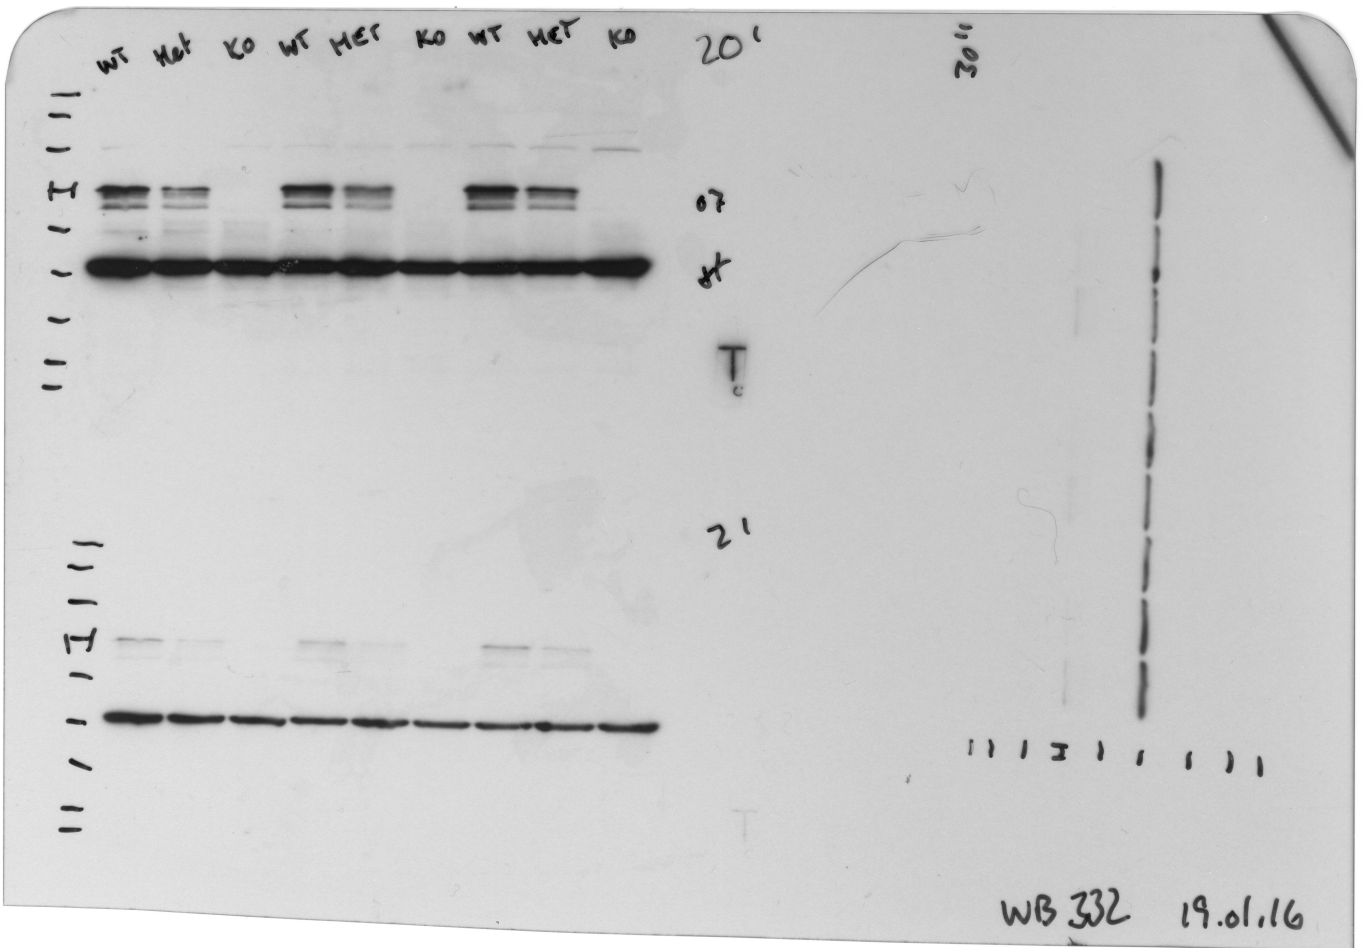

Supplement: EMBJ-35-2008-s003.pdf [file EMBJ-35-2008-s003.pdf]

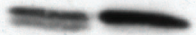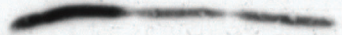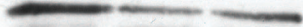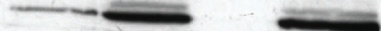

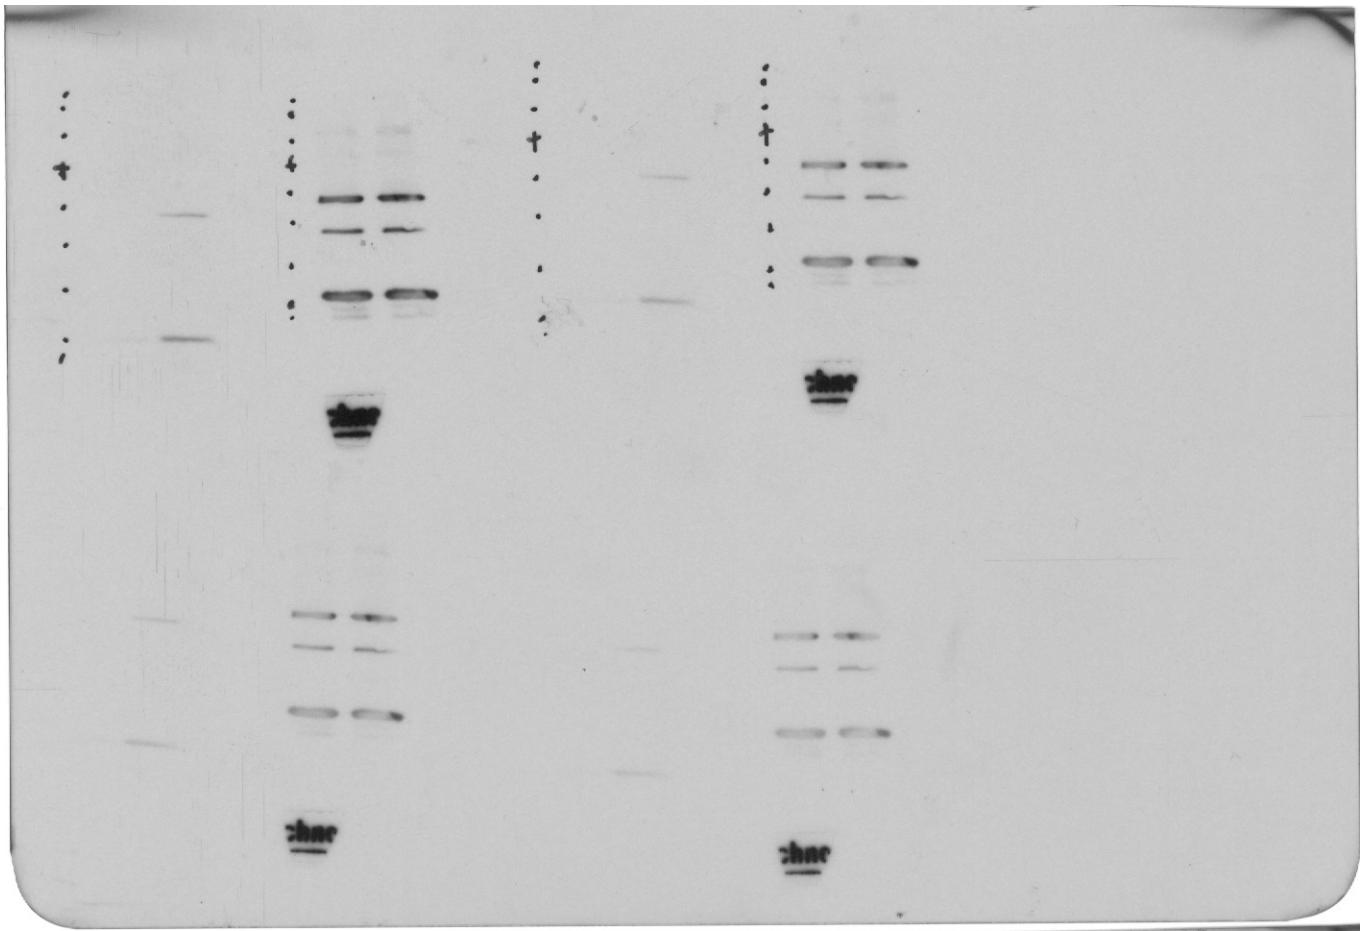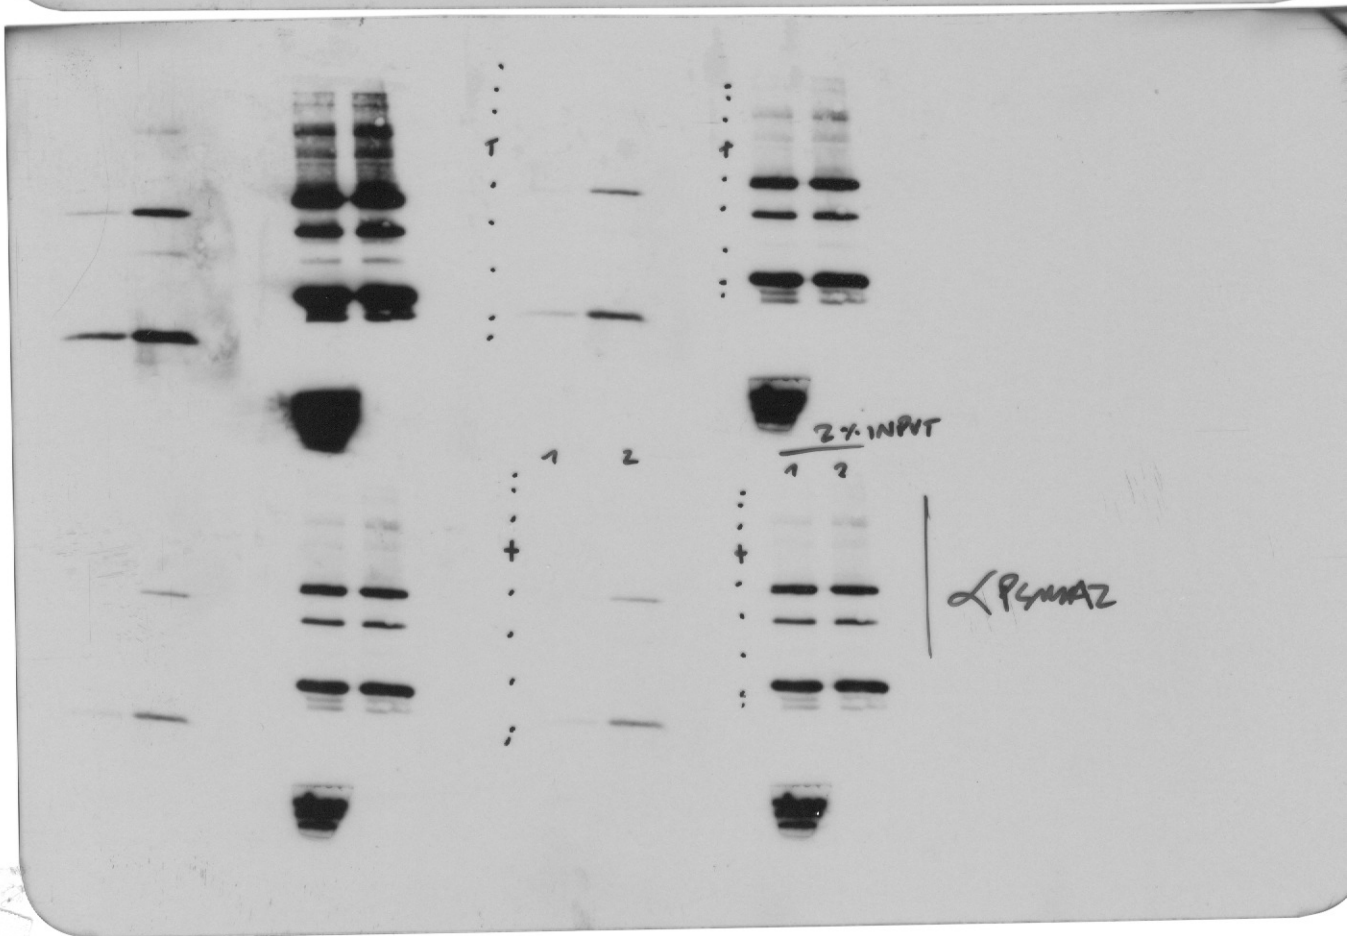

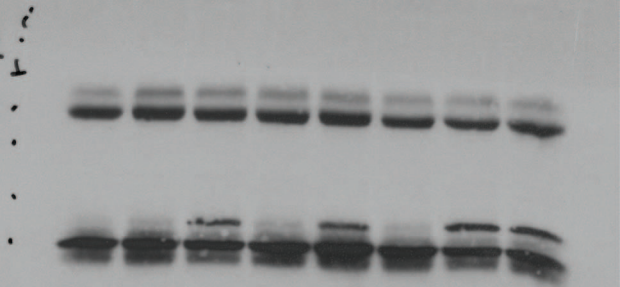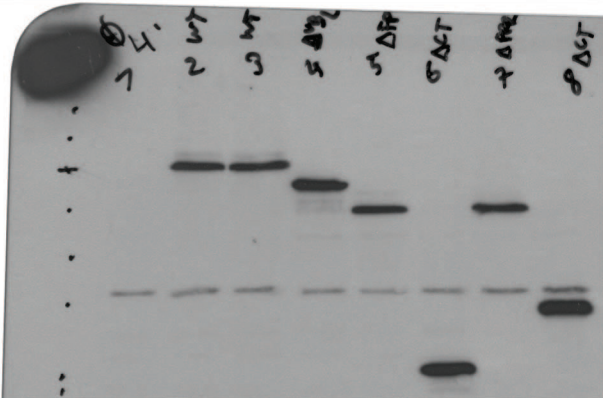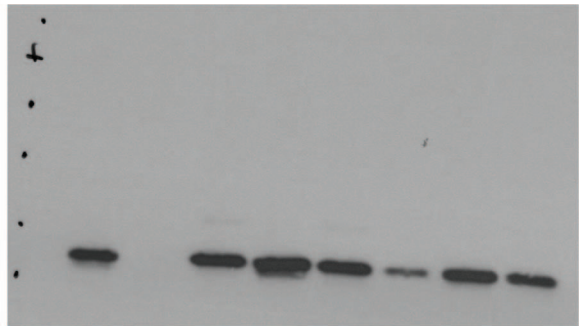



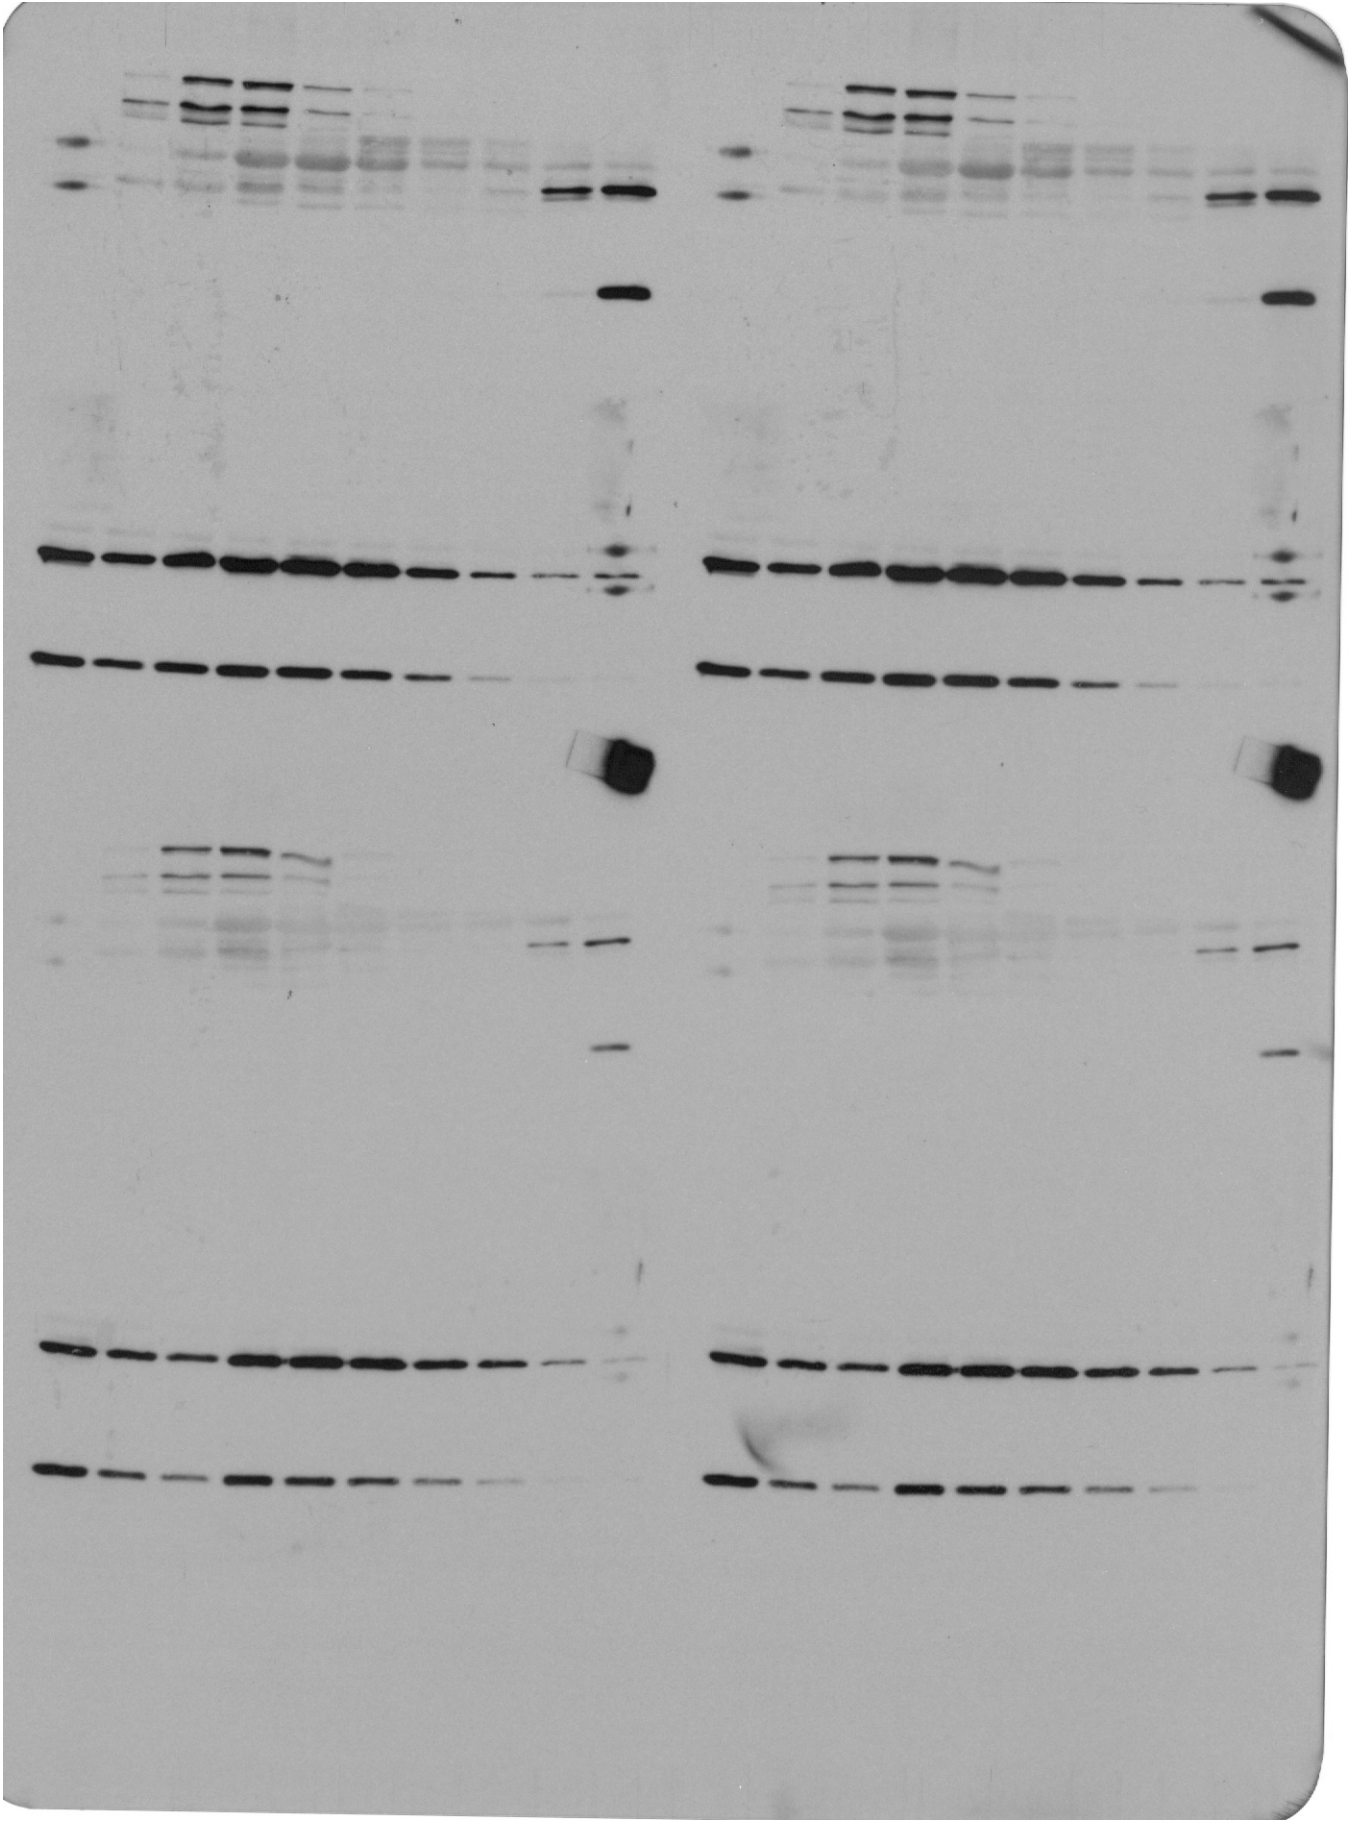



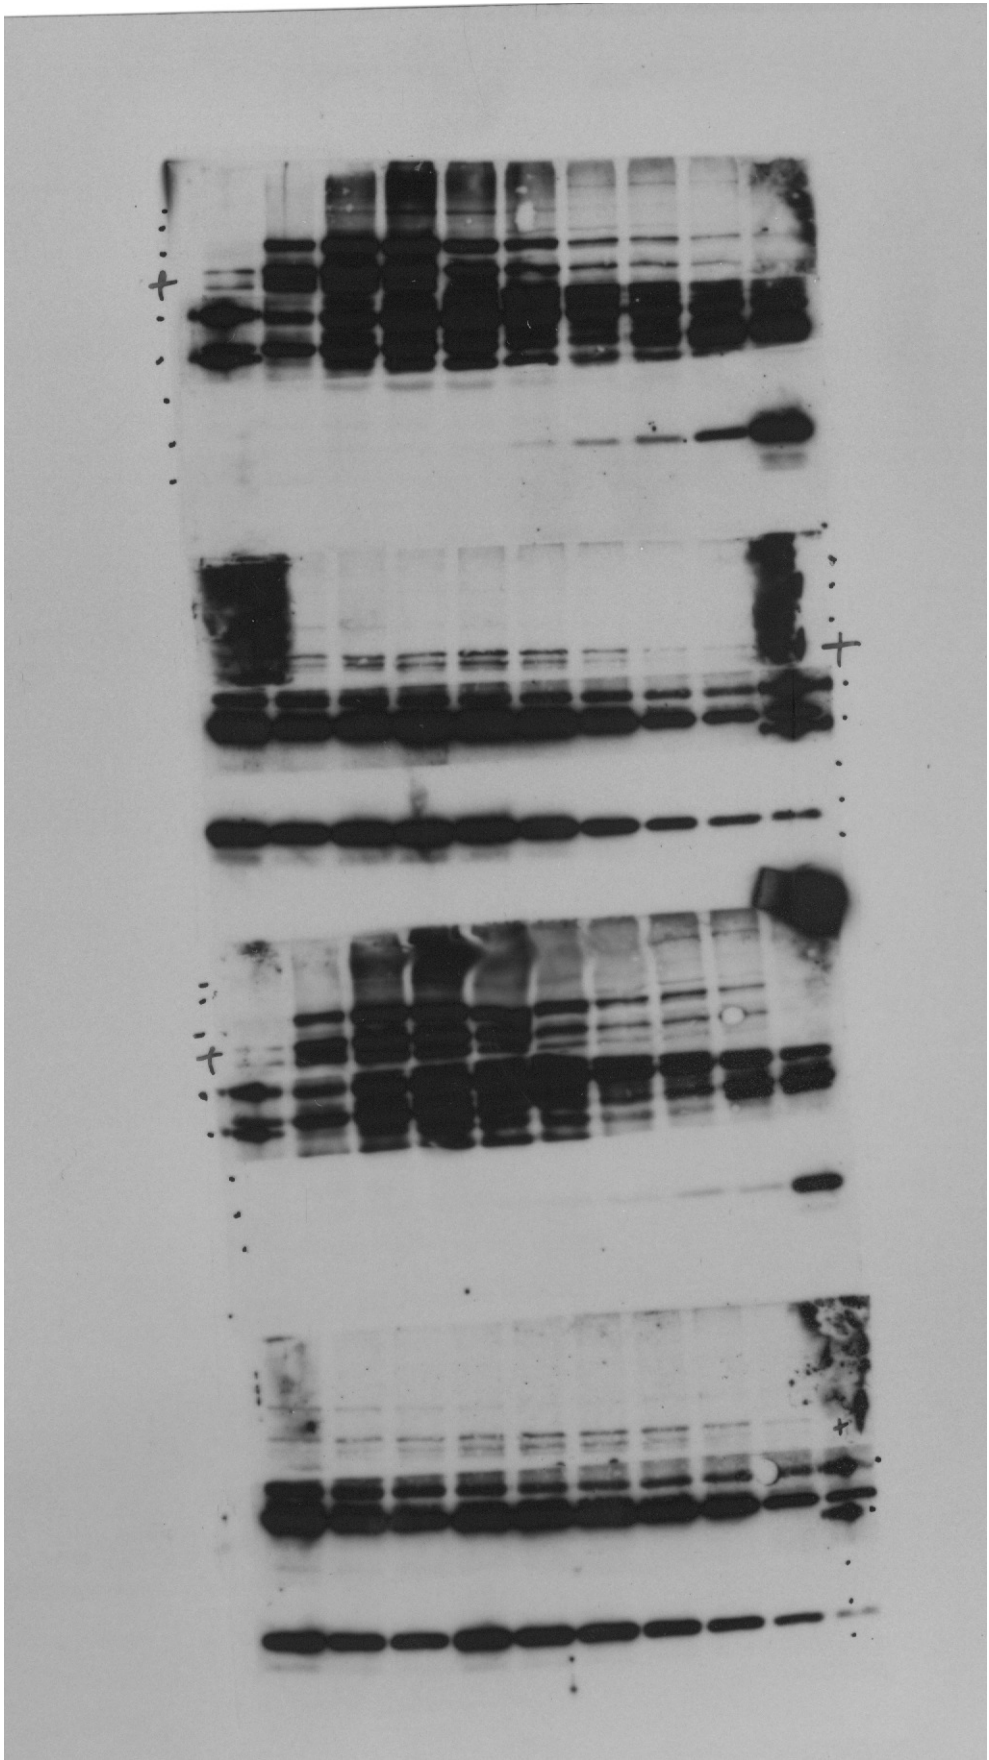

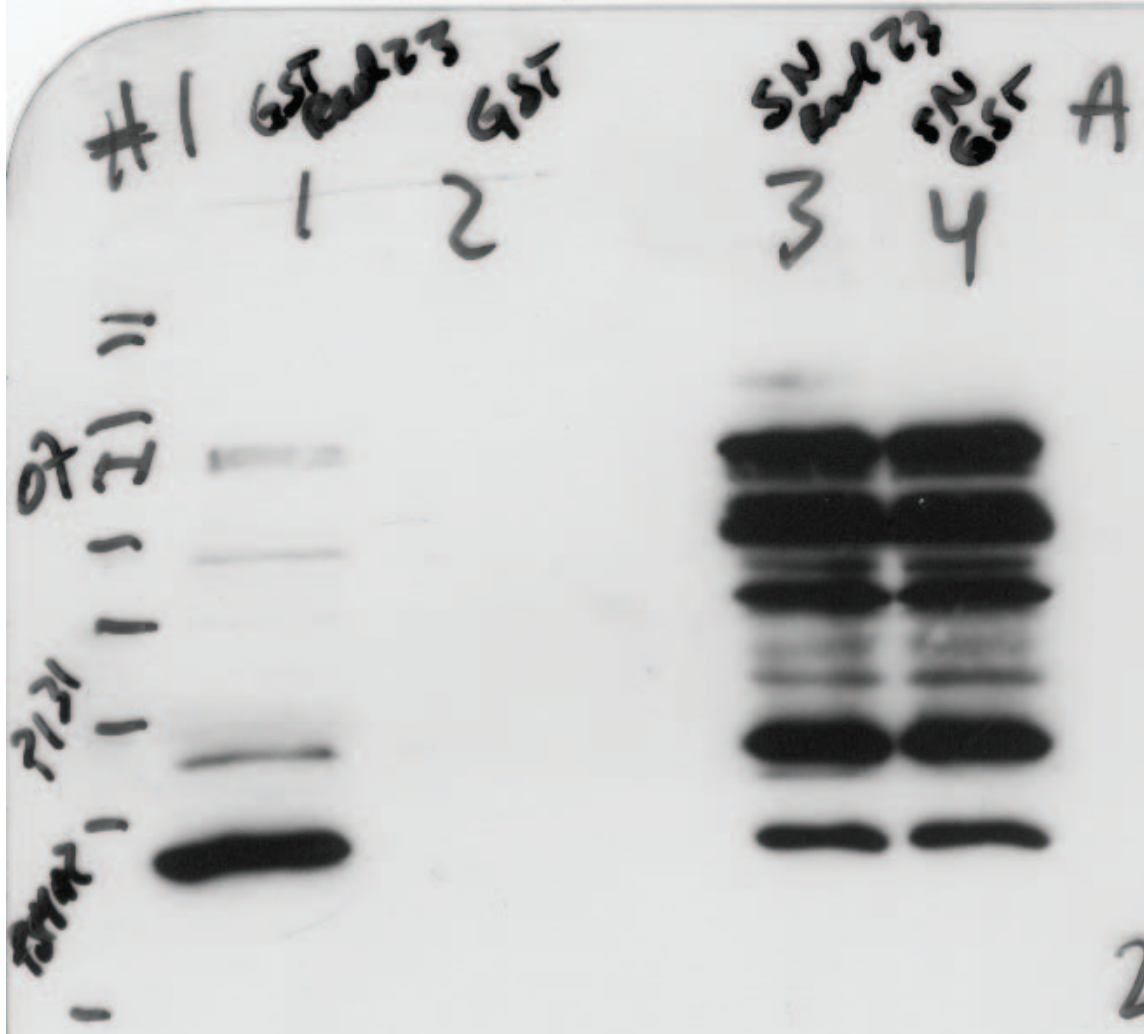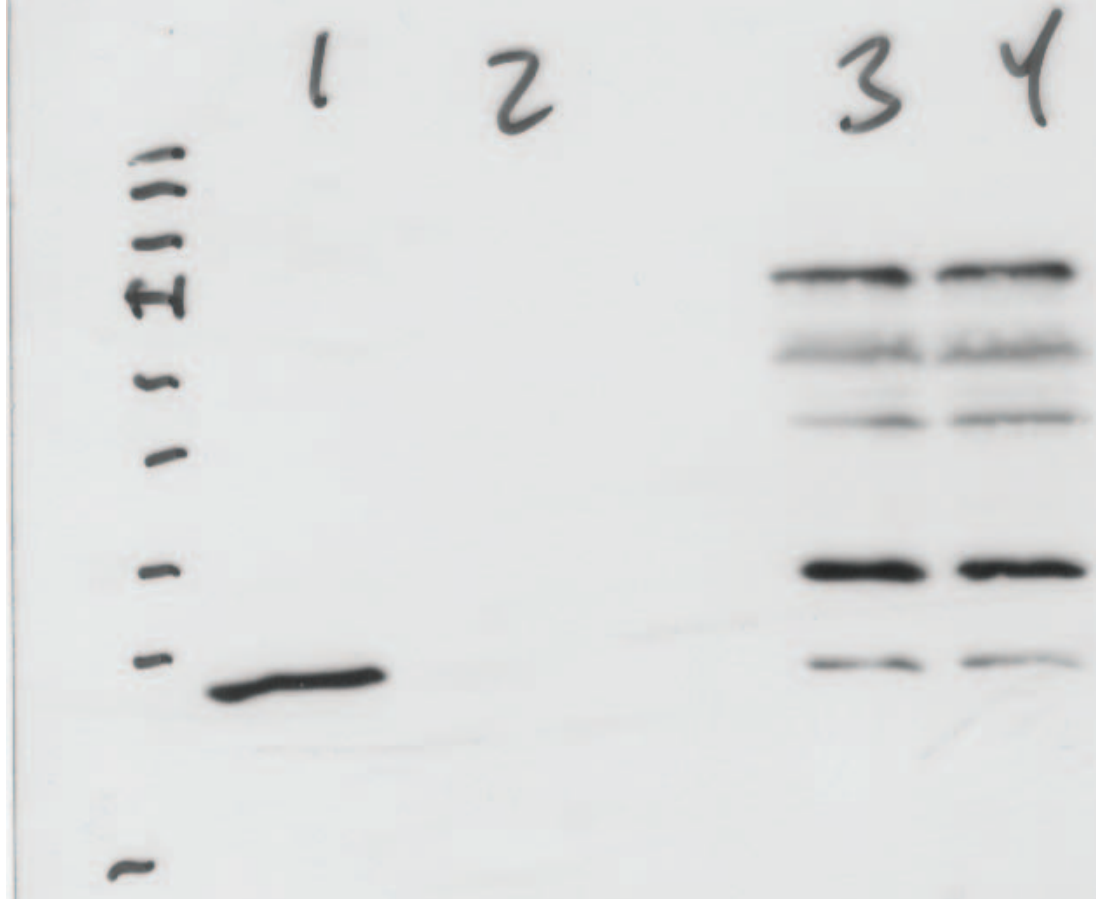

Supplement: EMBJ-35-2008-s004.pdf [file EMBJ-35-2008-s004.pdf]

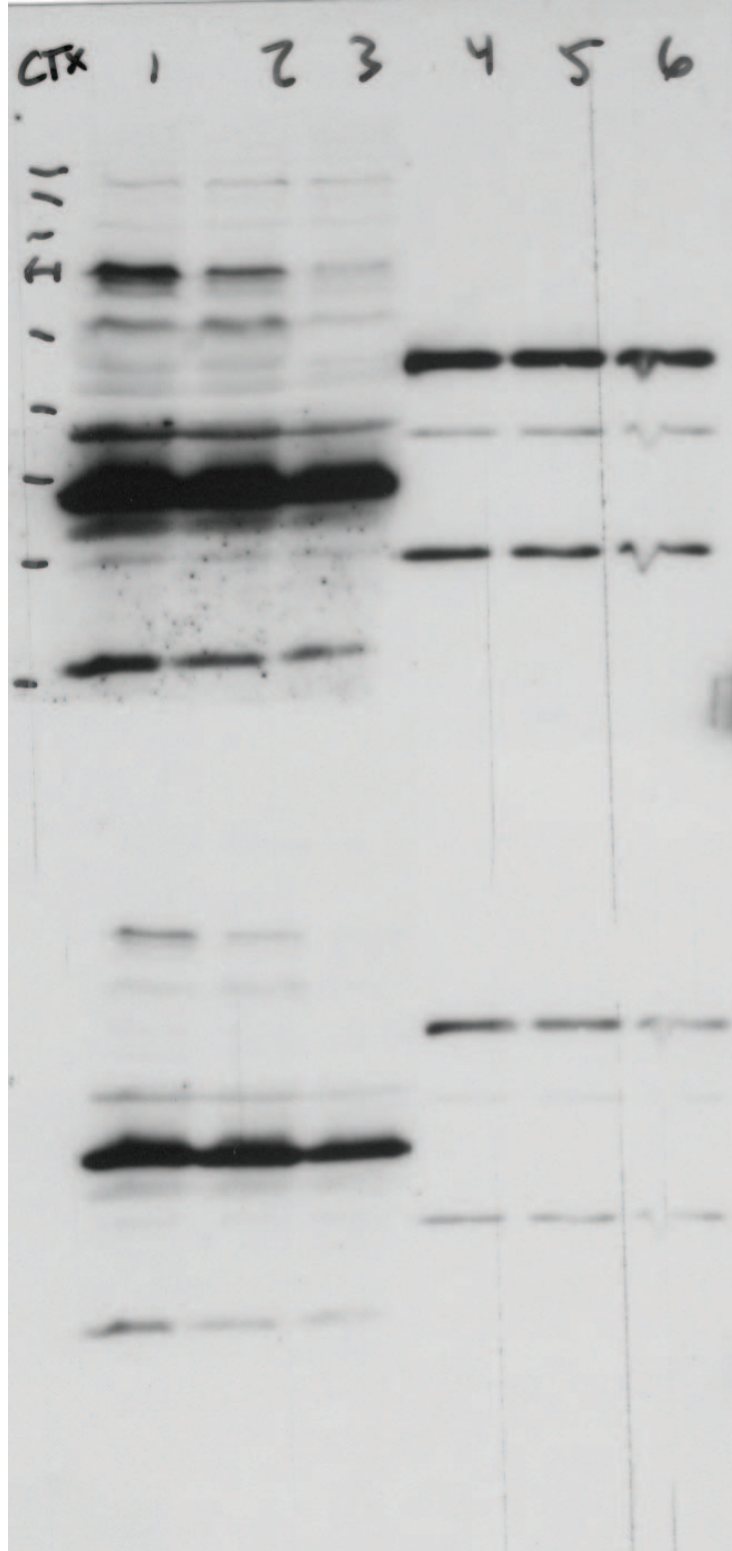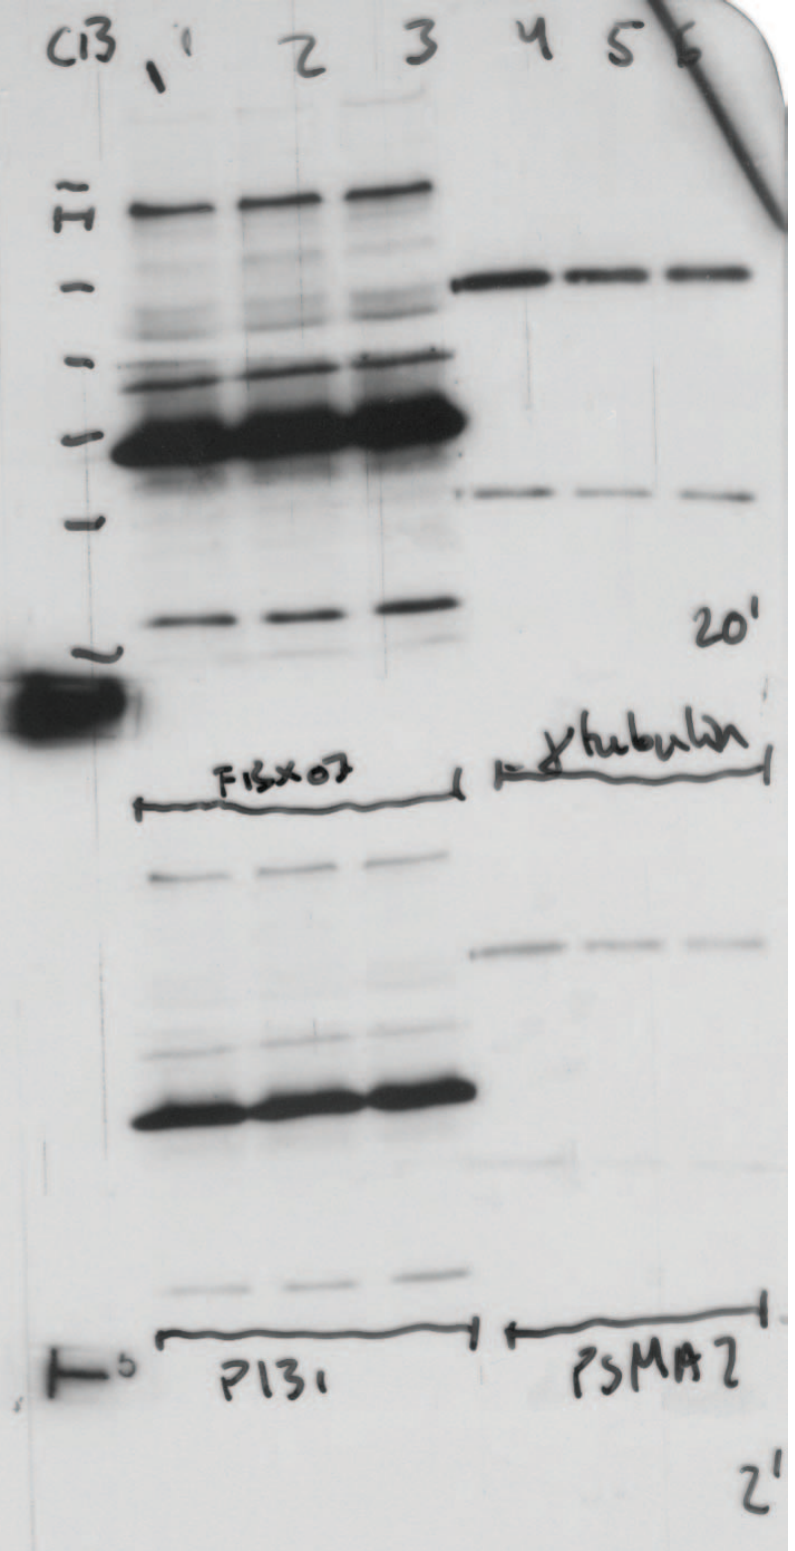

Supplement: EMBJ-35-2008-s007.pdf [file EMBJ-35-2008-s007.pdf]
